# Supplementary material
Source: HighWire-hosted journal article supplement (https://erj.ersjournals.com/content/53/4/1801789)
Supplement: inline-supplementary-material-2 [file inline-supplementary-material-2.pdf]

**Table S1. Strategy used for search database to identify studies for systematic review**

| <b>1. MEDLINE</b>        |                                                                                                                                                                                                                                                                                                                                                                                                                                                                         | <b>Results</b> |
|--------------------------|-------------------------------------------------------------------------------------------------------------------------------------------------------------------------------------------------------------------------------------------------------------------------------------------------------------------------------------------------------------------------------------------------------------------------------------------------------------------------|----------------|
| 1                        | exp Latent Tuberculosis/ or exp Tuberculin Test/ or exp Tuberculin/ or exp Interferon-gamma Release Tests/ or (latent tuberculosis or tuberculin or Interferon Gamma Release or IGRA or QuantiFERON or t spot).ti,ab,kw.                                                                                                                                                                                                                                                | 10021          |
| 2                        | exp Health Personnel/ or exp Students, Medical/ or exp Students, Nursing/ or exp Community Health Workers/ or (Physician* or Nurs*).ti,ab,kw. or ((Health* or Medica*) and (worker* or personnel* or professional* or staff* or student*)).ti,ab,kw.                                                                                                                                                                                                                    | 781514         |
| 3                        | exp Infectious Disease Transmission, Professional-to-Patient/ or exp Infectious Disease Transmission, Patient-to-Professional/ or exp Occupational Exposure/ or exp Occupational Diseases/ or (nosocomial or Occupational Exposure* or Occupational Disease*).ti,ab,kw.                                                                                                                                                                                                 | 109106         |
| 4                        | 2 or 3                                                                                                                                                                                                                                                                                                                                                                                                                                                                  | 857556         |
| 9                        | 1 and 4                                                                                                                                                                                                                                                                                                                                                                                                                                                                 | 1231           |
| 10                       | limit 9 to (humans and yr="2005 -Current")                                                                                                                                                                                                                                                                                                                                                                                                                              | 757            |
| <b>2. EMBASE</b>         |                                                                                                                                                                                                                                                                                                                                                                                                                                                                         |                |
| 1                        | exp Latent Tuberculosis/ or exp Tuberculin Test/ or exp Tuberculin/ or exp interferon gamma release assay/ or (latent tuberculosis or tuberculin or Interferon Gamma Release or IGRA or QuantiFERON or t spot).ti,ab,kw.                                                                                                                                                                                                                                                | 34784          |
| 2                        | exp health care personnel/ or exp medical student/ or exp nursing student/ or (Physician* or Nurs*).ti,ab,kw. or ((Health* or Medica*) and (worker* or personnel* or professional* or staff* or student*)).ti,ab,kw.                                                                                                                                                                                                                                                    | 1979172        |
| 3                        | exp Occupational Exposure/ or exp Occupational Diseases/ or (nosocomial or Occupational Exposure* or Occupational Disease*).ti,ab,kw.                                                                                                                                                                                                                                                                                                                                   | 233519         |
| 4                        | 2 or 3                                                                                                                                                                                                                                                                                                                                                                                                                                                                  | 2162720        |
| 5                        | 1 and 4                                                                                                                                                                                                                                                                                                                                                                                                                                                                 | 3462           |
| 10                       | limit 9 to (humans and yr="2005 -Current")                                                                                                                                                                                                                                                                                                                                                                                                                              | 2079           |
| <b>3. Web of Science</b> |                                                                                                                                                                                                                                                                                                                                                                                                                                                                         |                |
| 1                        | <b>TOPIC:</b> (latent tuberculosis) <i>OR</i> <b>TOPIC:</b> (tuberculin test) <i>OR</i> <b>TOPIC:</b> (tuberculin) <i>OR</i> <b>TOPIC:</b> (interferon gamma release assay) <i>OR</i> <b>TITLE:</b> (latent tuberculosis) <i>OR</i> <b>TITLE:</b> (tuberculin test) <i>OR</i> <b>TITLE:</b> (tuberculin) <i>OR</i> <b>TITLE:</b> (interferon gamma release assay) <i>OR</i> <b>TITLE:</b> (IGRA) <i>OR</i> <b>TITLE:</b> (QuantiFERON) <i>OR</i> <b>TITLE:</b> (t spot) | 8520           |

|   |                                                                                                                                                                                                                                                                                                                                                                                                                                                                                                                                                                                                                                                                                                                                                       |        |
|---|-------------------------------------------------------------------------------------------------------------------------------------------------------------------------------------------------------------------------------------------------------------------------------------------------------------------------------------------------------------------------------------------------------------------------------------------------------------------------------------------------------------------------------------------------------------------------------------------------------------------------------------------------------------------------------------------------------------------------------------------------------|--------|
|   | <i>Indexes=SCI-EXPANDED, SSCI, A&amp;HCI, CPCI-S, CPCI-SSH, ESCI, CCR-EXPANDED, IC Timespan=2005-2017</i>                                                                                                                                                                                                                                                                                                                                                                                                                                                                                                                                                                                                                                             |        |
| 2 | <p><b>TOPIC:</b> (health care worker*) <i>OR</i> <b>TOPIC:</b> (health personnel*) <i>OR</i> <b>TOPIC:</b> (physician*) <i>OR</i> <b>TOPIC:</b> (nurs*) <i>OR</i> <b>TOPIC:</b> (medical student*) <i>OR</i> <b>TOPIC:</b> (nursing student*) <i>OR</i> <b>TITLE:</b>(health care worker) <i>OR</i> <b>TITLE:</b> (health personnel*) <i>OR</i> <b>TITLE:</b> (physician*) <i>OR</i> <b>TITLE:</b> (nurs*)<i>OR</i> <b>TITLE:</b> (medical student*) <i>OR</i> <b>TITLE:</b> (nursing student*)</p> <p><i>Indexes=SCI-EXPANDED, SSCI, A&amp;HCI, CPCI-S, CPCI-SSH, ESCI, CCR-EXPANDED, IC Timespan=2005-2017</i></p>                                                                                                                                  | 356594 |
| 3 | <p><b>TOPIC:</b> (Infectious Disease Transmission, Professional-to-Patient) <i>OR</i> <b>TOPIC:</b> (Infectious Disease Transmission, Patient-to-Professional) <i>OR</i> <b>TOPIC:</b> (Occupational Exposure) <i>OR</i> <b>TOPIC:</b> (Occupational Diseases) <i>OR</i> <b>TOPIC:</b> (nosocomial exposure) <i>OR</i> <b>TITLE:</b> (Infectious Disease Transmission, Professional-to-Patient) <i>OR</i> <b>TITLE:</b> (Infectious Disease Transmission, Patient-to-Professional) <i>OR</i> <b>TITLE:</b> (Occupational Exposure) <i>OR</i> <b>TITLE:</b> (Occupational Diseases) <i>OR</i> <b>TITLE:</b> (nosocomial exposure)</p> <p><i>Indexes=SCI-EXPANDED, SSCI, A&amp;HCI, CPCI-S, CPCI-SSH, ESCI, CCR-EXPANDED, IC Timespan=2005-2017</i></p> | 29572  |
| 4 | <p>#3 <i>OR</i> #2</p> <p><i>Indexes=SCI-EXPANDED, SSCI, A&amp;HCI, CPCI-S, CPCI-SSH, ESCI, CCR-EXPANDED, IC Timespan=2005-2017</i></p>                                                                                                                                                                                                                                                                                                                                                                                                                                                                                                                                                                                                               | 381969 |
| 5 | <p>#4 <i>AND</i> #2</p> <p><i>Indexes=SCI-EXPANDED, SSCI, A&amp;HCI, CPCI-S, CPCI-SSH, ESCI, CCR-EXPANDED, IC Timespan=2005-2017</i></p>                                                                                                                                                                                                                                                                                                                                                                                                                                                                                                                                                                                                              | 701    |

**Table S2. Study quality assessment**

| Items                                                  | Quality                            | Description/Definition                                                                                                                                                                                                                                                      |
|--------------------------------------------------------|------------------------------------|-----------------------------------------------------------------------------------------------------------------------------------------------------------------------------------------------------------------------------------------------------------------------------|
| 1. Selection of the participants<br>Sampling strategy? | <input type="checkbox"/> High      | Census sampling (total population) or random sampling                                                                                                                                                                                                                       |
|                                                        | <input type="checkbox"/> Medium    | -                                                                                                                                                                                                                                                                           |
|                                                        | <input type="checkbox"/> Low       | Convenience sampling (participants were recruited because they were the easiest to recruit for the study, it can be participants who admitted to the occupational department, medical check up, routine screening, etc.)                                                    |
|                                                        | <input type="checkbox"/> Not clear | Not reported/not stated clearly                                                                                                                                                                                                                                             |
| 2. Measurement of the exposure                         | <input type="checkbox"/> High      | For cross-sectional study: Questionnaire verified by medical record/data provided by health facility manager<br>For cohort study: diary or log book or questionnaire verified by medical record/data provided by health facility manager                                    |
|                                                        | <input type="checkbox"/> Medium    | For cross-sectional study: Questionnaire not verified by medical record/data provided by health facility manager<br>For cohort study: Questionnaire not verified by medical record/data provided by health facility manager and any serial questionnaire for serial testing |
|                                                        | <input type="checkbox"/> Low       | No questionnaire provided and data only based on job type, location, other proxies                                                                                                                                                                                          |
|                                                        | <input type="checkbox"/> Not clear | Not reported/not stated clearly                                                                                                                                                                                                                                             |
| 3. Measurement of the outcome                          | <input type="checkbox"/> High      | Used the standard methods for TST or commercial assays for IGRA and definition based on the protocol or manufacturer                                                                                                                                                        |
|                                                        | <input type="checkbox"/> Medium    | Used the standard methods for TST or commercial assays for IGRA BUT definition not based on the protocol or manufacturer                                                                                                                                                    |
|                                                        | <input type="checkbox"/> Low       | -                                                                                                                                                                                                                                                                           |
|                                                        | <input type="checkbox"/> Not clear | Not reported/not stated clearly                                                                                                                                                                                                                                             |
| 4.1. Response rate (for prevalence)                    | <input type="checkbox"/> High      | More than 80%                                                                                                                                                                                                                                                               |
|                                                        | <input type="checkbox"/> Medium    | 50-80%                                                                                                                                                                                                                                                                      |
|                                                        | <input type="checkbox"/> Low       | Less than 50%                                                                                                                                                                                                                                                               |

| Items                                  | Quality                                 | Description/Definition                                                                                                                                                                                                                    |
|----------------------------------------|-----------------------------------------|-------------------------------------------------------------------------------------------------------------------------------------------------------------------------------------------------------------------------------------------|
|                                        | <input type="checkbox"/> Not clear      | Not reported/not stated clearly                                                                                                                                                                                                           |
| 4.2. Retention rate<br>(for incidence) | <input type="checkbox"/> High           | More than 90%                                                                                                                                                                                                                             |
|                                        | <input type="checkbox"/> Medium         | 50-90%                                                                                                                                                                                                                                    |
|                                        | <input type="checkbox"/> Low            | Less than 50%                                                                                                                                                                                                                             |
|                                        | <input type="checkbox"/> Not clear      | Not reported/not stated clearly                                                                                                                                                                                                           |
| 5. Results                             | <input type="checkbox"/> High           | For cross-sectional study: reported prevalence with 95% CI and adjusted POR with 95% CI<br>For cohort study: reported incidence with 95% CI and adjusted IRR/OR/RR/HR with 95% CI                                                         |
|                                        | <input type="checkbox"/> Medium         | For cross-sectional study: reported prevalence with 95% CI and not adjusted (crude) POR with 95% CI<br>For cohort study: reported incidence with 95% CI and not adjusted (crude) IRR/OR/RR/HR with 95% CI                                 |
|                                        | <input type="checkbox"/> Low            | -                                                                                                                                                                                                                                         |
|                                        | <input type="checkbox"/> Not clear      | Not reported/not stated clearly                                                                                                                                                                                                           |
| SUMMARY                                | <input type="checkbox"/> High quality   | <ul style="list-style-type: none"> <li>- Sampling strategy: census or random sampling</li> <li>AND</li> <li>- Participation rate: response rate &gt;80% for prevalence or retention rate &gt;90% for incidence</li> </ul>                 |
|                                        | <input type="checkbox"/> Medium quality | <ul style="list-style-type: none"> <li>- Sampling strategy: census or random sampling</li> <li>AND</li> <li>- Participation rate: response rate between 50%-80% for prevalence or retention rate between 50%-90% for incidence</li> </ul> |
|                                        | <input type="checkbox"/> Low quality    | <ul style="list-style-type: none"> <li>- Sampling strategy: convenience sampling or not clear</li> <li>AND/OR</li> <li>- Participation rate: &lt;50% or not clear</li> </ul>                                                              |

**Table S2a. Quality assessment of cross-sectional studies**

| <b>Author</b> | <b>Year</b> | <b>Type of test</b> | <b>1. Selection of the participants</b> | <b>2. Measurement of the exposure</b> | <b>3. Measurement of the outcome</b> | <b>4. Response rate</b> | <b>5. Reported results</b> | <b>SUMMARY</b> |
|---------------|-------------|---------------------|-----------------------------------------|---------------------------------------|--------------------------------------|-------------------------|----------------------------|----------------|
| Agaya         | 2015        | TST                 | High                                    | Medium                                | High                                 | Medium                  | High                       | Medium         |
| Babayigit     | 2014        | TST & IGRA          | Not clear                               | Medium                                | High                                 | Not clear               | Medium                     | Low            |
| Bandyopadhyay | 2010        | IGRA                | Not clear                               | Not clear                             | High                                 | Not clear               | Medium                     | Low            |
| Belo          | 2017        | TST                 | High                                    | Medium                                | High                                 | Medium                  | High                       | Medium         |
| Bozkanat      | 2016        | TST & IGRA          | Not clear                               | Medium                                | High                                 | Not clear               | Medium                     | Low            |
| Caglayan      | 2011        | TST & IGRA          | Not clear                               | Medium                                | High                                 | Not clear               | Medium                     | Low            |
| Christopher   | 2010        | TST                 | High                                    | High                                  | High                                 | High                    | High                       | High           |
| Da Costa      | 2006        | TST                 | Not clear                               | Not clear                             | High                                 | Not clear               | Medium                     | Low            |
| Dagnew        | 2012        | TST & IGRA          | Low                                     | Medium                                | High                                 | High                    | High                       | Low            |
| de Oliveira   | 2007        | TST                 | High                                    | Medium                                | High                                 | Not clear               | Medium                     | Low            |
| de Souza      | 2014        | TST & IGRA          | Not clear                               | Medium                                | High                                 | Not clear               | High                       | Low            |
| Drobniewski   | 2007        | IGRA                | High                                    | Medium                                | High                                 | High                    | High                       | High           |
| El-Sokkary    | 2015        | TST & IGRA          | High                                    | Medium                                | High                                 | High                    | Medium                     | High           |
| Encinales     | 2010        | TST                 | Not clear                               | Not clear                             | High                                 | Not clear               | Medium                     | Low            |
| Franco        | 2006        | TST                 | High                                    | Medium                                | High                                 | High                    | Medium                     | High           |
| Gupta         | 2015        | IGRA                | Low                                     | Medium                                | High                                 | Not clear               | Medium                     | Low            |
| He            | 2010        | TST                 | High                                    | Medium                                | High                                 | High                    | High                       | High           |
| He            | 2012        | TST & IGRA          | High                                    | Medium                                | High                                 | Medium                  | High                       | Medium         |
| Hefzy         | 2016        | TST & IGRA          | Not clear                               | Medium                                | High                                 | Not clear               | Medium                     | Low            |
| Islam         | 2014        | TST                 | High                                    | Medium                                | High                                 | High                    | Medium                     | High           |
| Kargi         | 2017        | TST & IGRA          | Not clear                               | Medium                                | High                                 | Not clear               | Medium                     | Low            |

| <b>Author</b>   | <b>Year</b> | <b>Type of test</b> | <b>1. Selection of the participants</b> | <b>2. Measurement of the exposure</b> | <b>3. Measurement of the outcome</b> | <b>4. Response rate</b> | <b>5. Reported results</b> | <b>SUMMARY</b> |
|-----------------|-------------|---------------------|-----------------------------------------|---------------------------------------|--------------------------------------|-------------------------|----------------------------|----------------|
| Khawcharoenporn | 2009        | TST                 | High                                    | Medium                                | High                                 | Medium                  | High                       | Medium         |
| Kwacharoenporn  | 2016        | TST & IGRA          | Low                                     | High                                  | High                                 | High                    | Medium                     | Low            |
| Lien            | 2009        | TST & IGRA          | High                                    | Medium                                | High                                 | High                    | High                       | High           |
| Liu             | 2015        | IGRA                | Not clear                               | Not clear                             | High                                 | Not clear               | Medium                     | Low            |
| Lou             | 2015        | TST                 | High                                    | Medium                                | High                                 | High                    | High                       | High           |
| Maciel          | 2007        | TST                 | High                                    | Medium                                | High                                 | High                    | Medium                     | High           |
| Mirtskulava     | 2008        | TST & IGRA          | Not clear                               | Medium                                | High                                 | Not clear               | High                       | Low            |
| Mostafavi       | 2016        | TST & IGRA          | High                                    | Medium                                | High                                 | High                    | Medium                     | High           |
| Munisamy        | 2017        | TST                 | High                                    | Medium                                | High                                 | High                    | Medium                     | High           |
| Nasehi          | 2017        | TST                 | High                                    | Medium                                | High                                 | High                    | High                       | High           |
| Nikokar         | 2010        | TST                 | Not clear                               | Medium                                | High                                 | Not clear               | Medium                     | Low            |
| Nikolova        | 2013        | IGRA                | Not clear                               | Not clear                             | High                                 | Not clear               | Medium                     | Low            |
| Nonghanphithak  | 2016        | IGRA                | Not clear                               | Medium                                | High                                 | Not clear               | High                       | Low            |
| Ozdemir         | 2006        | TST                 | Not clear                               | Not clear                             | High                                 | Low                     | Medium                     | Low            |
| Ozdemir         | 2007        | TST & IGRA          | High                                    | Medium                                | High                                 | Medium                  | High                       | Medium         |
| Ozsoy           | 2010        | TST                 | Not clear                               | Not clear                             | High                                 | Not clear               | Medium                     | Low            |
| Powell          | 2011        | TST                 | High                                    | Medium                                | High                                 | Medium                  | High                       | Medium         |
| Rafiza          | 2011        | TST & IGRA          | High                                    | Medium                                | High                                 | High                    | High                       | High           |
| Ratnatunga      | 2015        | TST & IGRA          | High                                    | Medium                                | High                                 | Medium                  | Medium                     | Medium         |
| Rodrigues       | 2009        | TST                 | High                                    | Medium                                | High                                 | Medium                  | Medium                     | Medium         |
| Rogério         | 2013        | TST                 | High                                    | Medium                                | High                                 | High                    | Medium                     | High           |
| Rogério         | 2015        | TST                 | High                                    | Medium                                | High                                 | High                    | High                       | High           |
| Rutanga         | 2015        | TST                 | High                                    | Medium                                | High                                 | Medium                  | High                       | Medium         |

| <b>Author</b> | <b>Year</b> | <b>Type of test</b> | <b>1. Selection of the participants</b> | <b>2. Measurement of the exposure</b> | <b>3. Measurement of the outcome</b> | <b>4. Response rate</b> | <b>5. Reported results</b> | <b>SUMMARY</b> |
|---------------|-------------|---------------------|-----------------------------------------|---------------------------------------|--------------------------------------|-------------------------|----------------------------|----------------|
| Salmanzadeh   | 2016        | TST & IGRA          | Not clear                               | Medium                                | High                                 | Not clear               | Medium                     | Low            |
| Sawhney       | 2015        | TST                 | Not clear                               | Not clear                             | High                                 | Not clear               | Medium                     | Low            |
| Severo        | 2011        | TST                 | High                                    | Medium                                | High                                 | High                    | Medium                     | High           |
| Sharifi-Mood  | 2006        | TST                 | Not clear                               | Not clear                             | High                                 | Not clear               | Not clear                  | Low            |
| Siddiqi       | 2012        | IGRA                | Not clear                               | Not clear                             | High                                 | Not clear               | Medium                     | Low            |
| Taheri        | 2013        | TST                 | Not clear                               | High                                  | High                                 | Not clear               | Medium                     | Low            |
| Talebi-Taher  | 2011        | TST & IGRA          | Not clear                               | Medium                                | High                                 | Not clear               | Medium                     | Low            |
| Thuong        | 2016        | IGRA                | Not clear                               | Medium                                | High                                 | Not clear               | High                       | Low            |
| Topic         | 2009        | TST & IGRA          | Low                                     | Not clear                             | High                                 | Not clear               | Medium                     | Low            |
| van Rie       | 2013        | TST & IGRA          | Not clear                               | Medium                                | High                                 | Not clear               | High                       | Low            |
| Wei           | 2013        | TST & IGRA          | Low                                     | Medium                                | High                                 | Not clear               | High                       | Low            |
| Yalcin        | 2005        | TST                 | High                                    | Not clear                             | High                                 | Medium                  | Medium                     | Medium         |
| Zhang         | 2013        | IGRA                | High                                    | High                                  | High                                 | High                    | High                       | High           |
| Zhou          | 2014        | TST                 | High                                    | Medium                                | High                                 | Medium                  | High                       | Medium         |
| Zhu           | 2014        | IGRA                | Not clear                               | Not clear                             | High                                 | Not clear               | Medium                     | Low            |

**Table S2b. Quality assessment of cohort studies**

| Author          | Year | Type of test | 1. Selection of the participants | 2. Measurement of the exposure | 3. Measurement of the outcome | 4. A. Response rate for prevalence | 4. B. Retention rate for incidence | 5. A. Results for prevalence | 5. B. Results for incidence | SUMMARY for Prevalence  | SUMMARY for Incidence |
|-----------------|------|--------------|----------------------------------|--------------------------------|-------------------------------|------------------------------------|------------------------------------|------------------------------|-----------------------------|-------------------------|-----------------------|
| Adams           | 2015 | TST & IGRA   | High                             | Medium                         | High                          | Medium                             | Medium                             | Medium                       | High                        | Medium                  | Medium                |
| Borroto         | 2011 | TST          | High                             | Medium                         | High                          | High                               | Medium                             | High                         | Medium                      | High                    | Medium                |
| Calixto-Aguilar | 2016 | TST          | High                             | Medium                         | High                          | Medium                             | High                               | Medium                       | Medium                      | Medium                  | High                  |
| Christopher     | 2011 | TST          | High                             | High                           | High                          | Reported in other paper            | Medium                             | Reported in other paper      | High                        | Reported in other paper | Medium                |
| Chung-Delgado   | 2012 | TST          | High                             | High                           | High                          | Medium                             | High                               | High                         | High                        | Medium                  | High                  |
| Corbett         | 2007 | TST          | High                             | High                           | High                          | High                               | High                               | Medium                       | High                        | High                    | High                  |
| da Costa        | 2009 | TST          | Not clear                        | Medium                         | High                          | Not clear                          | Not clear                          | Not clear                    | High                        | Low                     | Low                   |
| de Miranda      | 2012 | TST          | High                             | High                           | High                          | High                               | Low                                | Medium                       | Medium                      | High                    | Low                   |
| Emadi-Koochak   | 2009 | TST          | Not clear                        | Low                            | High                          | Not clear                          | Medium                             | Not clear                    | Medium                      | Low                     | Low                   |
| Escombe         | 2010 | IGRA         | High                             | High                           | High                          | Not clear                          | Medium                             | Medium                       | Medium                      | Low                     | Medium                |
| Gonzalez        | 2011 | TST          | Not clear                        | Low                            | High                          | NA                                 | Medium                             | Low                          | Low                         | NA                      | Low                   |
| Gutierrez       | 2012 | TST          | High                             | Medium                         | High                          | Medium                             | Medium                             | Medium                       | Medium                      | Medium                  | Medium                |
| He              | 2015 | TST & IGRA   | High                             | Medium                         | High                          | High                               | Medium                             | High                         | High                        | High                    | Medium                |
| Hohmuth         | 2006 | TST          | High                             | Not clear                      | High                          | High                               | Low                                | Medium                       | Medium                      | High                    | Low                   |
| Kiertiburanakul | 2012 | TST          | High                             | Not clear                      | High                          | Not clear                          | Medium                             | High                         | Medium                      | Low                     | Medium                |
| Li-fan          | 2013 | TST & IGRA   | High                             | Medium                         | High                          | High                               | No data on incidence               | High                         | No data on incidence        | High                    | NA                    |



| Author        | Year | Type of test | 1. Selection of the participants | 2. Measurement of the exposure | 3. Measurement of the outcome | 4. A. Response rate for prevalence | 4. B. Retention rate for incidence | 5. A. Results for prevalence | 5. B. Results for incidence | SUMMARY for Prevalence  | SUMMARY for Incidence |
|---------------|------|--------------|----------------------------------|--------------------------------|-------------------------------|------------------------------------|------------------------------------|------------------------------|-----------------------------|-------------------------|-----------------------|
| Lopes         | 2008 | TST          | High                             | Medium                         | High                          | Medium                             | Medium                             | High                         | Medium                      | Medium                  | Medium                |
| McCarthy      | 2015 | TST & IGRA   | High                             | High                           | High                          | Reported in other paper            | Medium                             | Reported in other paper      | High                        | Reported in other paper | Medium                |
| Moreira       | 2010 | TST          | High                             | High                           | High                          | High                               | High                               | Medium                       | Medium                      | High                    | High                  |
| Pai           | 2006 | TST & IGRA   | High                             | Not clear                      | High                          | Reported in other paper            | Medium                             | Reported in other paper      | Medium                      | Reported in other paper | Medium                |
| Perez-Lu      | 2013 | TST          | Low                              | Medium                         | High                          | High                               | High                               | Medium                       | High                        | Low                     | Low                   |
| Rabahi        | 2007 | TST          | High                             | Medium                         | High                          | Not clear                          | Medium                             | Medium                       | Medium                      | Low                     | Medium                |
| Rafiza        | 2015 | IGRA         | High                             | Medium                         | High                          | Reported in other paper            | Medium                             | Reported in other paper      | High                        | Reported in other paper | Medium                |
| Sawanyawisuth | 2012 | TST          | Low                              | Low                            | High                          | Not clear                          | Low                                | Not clear                    | High                        | Low                     | Low                   |
| Whitaker      | 2013 | TST & IGRA   | Low                              | Medium                         | High                          | Not clear                          | Medium                             | High                         | High                        | Low                     | Low                   |
| Zwerling      | 2013 | IGRA         | Not clear                        | High                           | High                          | Not clear                          | Not clear                          | Medium                       | High                        | Low                     | Low                   |

NA, Not applicable

**Table S3. Characteristics of studies included in the systematic review**

| <b>Author, Year</b>   | <b>Country</b>            | <b>Study year</b> | <b>TB Incidence at the study year <sup>a</sup></b> | <b>Type of study</b> | <b>Type of setting</b>                  | <b>Type of participant</b>   | <b>Test used</b> | <b>Number of participants</b> | <b>Quality Summary</b> |
|-----------------------|---------------------------|-------------------|----------------------------------------------------|----------------------|-----------------------------------------|------------------------------|------------------|-------------------------------|------------------------|
| Adams, 2015           | South Africa              | 2009-2011         | 946                                                | Cohort, prospective  | Hospital and Primary health center      | All types of HCWs            | TST & IGRA       | 505                           | P: Medium, I: Medium   |
| Agaya, 2015           | Kenya                     | 2013              | 443                                                | Cross-sectional      | Hospital, Dispensary, Health centers    | All types of HCWs            | TST              | 898                           | P: Medium              |
| Babayigit, 2014       | Turkey                    | Not stated        | 20                                                 | Cross-sectional      | General Hospital, TB control dispensary | All types of HCWs            | TST & IGRA       | 96                            | P: Low                 |
| Bandyopadhyay, 2010   | India                     | 2004-2005         | 281                                                | Cross-sectional      | General Hospital                        | Nursing and medical students | IGRA             | 50                            | P: Low                 |
| Belo, 2017            | Mozambique                | 2014-2015         | 551                                                | Cross-sectional      | Hospital                                | All types of HCWs            | TST              | 209                           | P: Medium              |
| Borroto, 2011         | Cuba                      | 2007              | 7.8                                                | Cohort, prospective  | Hospital                                | All types of HCWs            | TST              | 350                           | P: High, I: Medium     |
| Bozkanat, 2016        | Turkey                    | 2008              | 29                                                 | Cross-sectional      | TB Hospital                             | All types of HCWs            | TST & IGRA       | 34                            | P: Low                 |
| Caglayan, 2011        | Turkey                    | 2005              | 33                                                 | Cross-sectional      | TB Hospital                             | All types of HCWs            | TST & IGRA       | 78                            | P: Low                 |
| Calixto-Aguilar, 2016 | Peru (article in Spanish) | 2013              | 122                                                | Cohort, prospective  | University hospital                     | Medical students             | TST              | 548                           | P: Medium, I: High     |
| Christopher, 2010     | India                     | 2007              | 268                                                | Cross-sectional      | Hospital                                | Nursing students             | TST              | 436                           | P: High                |

| Author, Year        | Country                   | Study year | TB Incidence at the study year <sup>a</sup> | Type of study         | Type of setting                             | Type of participant           | Test used  | Number of participants | Quality Summary    |
|---------------------|---------------------------|------------|---------------------------------------------|-----------------------|---------------------------------------------|-------------------------------|------------|------------------------|--------------------|
| Christopher, 2011   | India                     | 2007-2008  | 265                                         | Cohort, prospective   | Hospital                                    | Nursing students              | TST        | 436                    | P: -, I: Medium    |
| Chung-Delgado, 2012 | Peru (article in Spanish) | 2007-2010  | 138                                         | Cohort, retrospective | University hospital                         | Medical students              | TST        | 547                    | P: Medium, I: High |
| Corbett, 2007       | Zimbabwe                  | 2004-2005  | 598                                         | Cohort, prospective   | Hospital                                    | Nursing students              | TST        | 351                    | P: High, I: High   |
| Da Costa, 2006      | Brazil                    | 2002       | 52                                          | Cross-sectional       | Psychiatric Hospital                        | All types of HCWs             | TST        | 31                     | P: Low             |
| da Costa, 2009      | Brazil                    | 1999-2003  | 51                                          | Cohort, prospective   | Hospital                                    | All types of HCWs             | TST        | Not clear              | P: -, I: Low       |
| Dagnew, 2012        | Ethiopia                  | 2008-2009  | 289                                         | Cross-sectional       | University, Faculty of Medicine             | Medical, Paramedical students | TST & IGRA | 107                    | P: Low             |
| de Miranda, 2012    | Brazil                    | 2006-2008  | 46                                          | Cohort, prospective   | Clinics                                     | All types of HCWs             | TST        | 251                    | P: High, I: Low    |
| de Oliveira, 2007   | Brazil                    | 2004       | 54                                          | Cross-sectional       | University hospital                         | All types of HCWs             | TST        | 194                    | P: Low             |
| de Souza, 2014      | Brazil                    | 2011-2012  | 43                                          | Cross-sectional       | Health centers                              | All types of HCWs             | TST & IGRA | 632                    | P: Low             |
| Drobniewski, 2007   | Russia                    | 2004-2005  | 87                                          | Cross-sectional       | Clinics, Health centres; Medical University | HCWs and medical students     | IGRA       | 500                    | P: High            |
| El-Sokkary, 2015    | Egypt                     | 2012-2013  | 17                                          | Cross-sectional       | General Hospital, TB Hospital               | Nurses and Lab personnel      | TST & IGRA | 132                    | P: High            |

| Author, Year        | Country                        | Study year | TB Incidence at the study year <sup>a</sup> | Type of study       | Type of setting                                           | Type of participant                    | Test used  | Number of participants | Quality Summary      |
|---------------------|--------------------------------|------------|---------------------------------------------|---------------------|-----------------------------------------------------------|----------------------------------------|------------|------------------------|----------------------|
| Emadi-Koochak, 2009 | Iran                           | 2003-2006  | 18                                          | Cohort, prospective | Hospital                                                  | Medical students and pharmacy students | TST        | 256                    | P: Low, I: Low       |
| Encinales, 2010     | Colombia                       | 1999-2006  | 34                                          | Cross-sectional     | TB hospital                                               | All types of HCWs                      | TST        | 150                    | P: Low               |
| Escombe, 2010       | Peru                           | 2005-2006  | 153                                         | Cohort, prospective | Hospital                                                  | All types of HCWs                      | IGRA       | 70                     | P: Low, I: Medium    |
| Franco, 2006        | Brazil                         | 2001-2002  | 50                                          | Cross-sectional     | Hospital                                                  | Nurses                                 | TST        | 169                    | P: High              |
| Gonzalez, 2011      | Argentina (article in Spanish) | 2008-2009  | 24                                          | Cohort, prospective | General hospital                                          | All types of HCWs and students         | TST        | 275                    | P: -, I: Low         |
| Gupta, 2015         | India                          | 2012       | 234                                         | Cross-sectional     | General Hospital                                          | All types of HCWs                      | IGRA       | 40                     | P: Low               |
| Gutierrez, 2012     | Cuba (article in Spanish)      | 2007-2008  | 7.8                                         | Cohort, prospective | University hospital                                       | All types of HCWs                      | TST        | 183                    | P: Medium, I: Medium |
| He, 2010            | China                          | 2005       | 92                                          | Cross-sectional     | TB center with TB clinic                                  | All types of HCWs                      | TST        | 2153                   | P: High              |
| He, 2012            | China                          | 2010       | 77                                          | Cross-sectional     | Hospital                                                  | All types of HCWs                      | TST & IGRA | 999                    | P: Medium            |
| He, 2015            | China                          | 2011-2012  | 75                                          | Cohort, prospective | Community health center, village clinic, community clinic | Village doctor                         | TST & IGRA | 704                    | P: High, I: Medium   |

| Author, Year          | Country    | Study year | TB Incidence at the study year <sup>a</sup> | Type of study       | Type of setting               | Type of participant                                                       | Test used  | Number of participants | Quality Summary   |
|-----------------------|------------|------------|---------------------------------------------|---------------------|-------------------------------|---------------------------------------------------------------------------|------------|------------------------|-------------------|
| Hefzy, 2016           | Egypt      | 2015-2016  | 15                                          | Cross-sectional     | General Hospital              | Physicians, housekeeper                                                   | TST & IGRA | 44                     | P: Low            |
| Hohmuth, 2006         | Peru       | 2002-2003  | 160                                         | Cohort, prospective | Hospital                      | All types of HCSs: nursing, medical, pharmacy and lab technician students | TST        | 559                    | P: High, I: Low   |
| Islam, 2014           | Bangladesh | 2013       | 221                                         | Cross-sectional     | Chest disease hospital        | All types of HCWs                                                         | TST        | 449                    | P: High           |
| Kargi, 2017           | Turkey     | Not stated | 18                                          | Cross-sectional     | General Hospital              | All types of HCWs                                                         | TST & IGRA | 100                    | P: Low            |
| Khawcharoenporn, 2009 | Thailand   | 2006-2007  | 210                                         | Cross-sectional     | Hospital                      | Medical students                                                          | TST        | 166                    | P: Medium         |
| Khawcharoenporn, 2016 | Thailand   | 2014       | 171                                         | Cross-sectional     | General Hospital              | All types of HCWs                                                         | TST & IGRA | 260                    | P: Low            |
| Kiertiburanakul, 2012 | Thailand   | 2005-2008  | 210                                         | Cohort, prospective | Hospital                      | Nurses, nursing and medical students                                      | TST        | 1438                   | P: Low, I: Medium |
| Li-fan, 2013          | China      | 2005-2011  | 84                                          | Cohort, prospective | Hospital                      | All types of HCWs                                                         | TST & IGRA | 104                    | P: High, I: NA    |
| Lien, 2009            | Viet Nam   | 2007       | 168                                         | Cross-sectional     | General Hospital, TB Hospital | All types of HCWs                                                         | TST & IGRA | 300                    | P: High           |
| Liu, 2015             | China      | 2010-2011  | 77                                          | Cross-sectional     | General Hospital              | All types of HCWs                                                         | IGRA       | 115                    | P: Low            |

| Author, Year      | Country      | Study year | TB Incidence at the study year <sup>a</sup> | Type of study       | Type of setting                              | Type of participant                                                           | Test used  | Number of participants | Quality Summary      |
|-------------------|--------------|------------|---------------------------------------------|---------------------|----------------------------------------------|-------------------------------------------------------------------------------|------------|------------------------|----------------------|
| Lopes, 2008       | Brazil       | 2001-2004  | 52                                          | Cohort, prospective | Hospital                                     | Nurses                                                                        | TST        | 128                    | P: Medium, I: Medium |
| Lou, 2015         | Uganda       | 2009       | 213                                         | Cross-sectional     | Hospital                                     | All types of HCSs: medicine and surgery, dental surgery, and nursing students | TST        | 288                    | P: High              |
| Maciel, 2007      | Brazil       | 1999-2002  | 50                                          | Cross-sectional     | Hospital                                     | Nursing and medical students                                                  | TST        | 605                    | P: High              |
| McCarthy, 2015    | South Africa | 2008-2009  | 972                                         | Cohort, prospective | Hospital, TB-HIV clinic                      | HCWs and medical students                                                     | TST & IGRA | 199                    | P: -, I: Medium      |
| Mirtskulava, 2008 | Georgia      | 2006       | 161                                         | Cross-sectional     | Health care facilities which part of the NTP | All types of HCWs                                                             | TST & IGRA | 265                    | P: Low               |
| Moreira, 2010     | Brazil       | 2007-2008  | 46                                          | Cohort, prospective | Primary health care                          | Community Health Agents                                                       | TST        | 72                     | P: High, I: High     |
| Mostafavi, 2016   | Iran         | 2013-2014  | 17                                          | Cross-sectional     | Laboratory facility                          | Lab personnel                                                                 | TST & IGRA | 177                    | P: High              |
| Munisamy, 2017    | Malaysia     | 2014       | 92                                          | Cross-sectional     | Hospital                                     | All types of HCWs                                                             | TST        | 399                    | P: High              |
| Nasehi, 2017      | Iran         | 2013       | 18                                          | Cross-sectional     | Laboratory facility and Low risk HCWs        | Lab personnel                                                                 | TST        | 1006                   | P: High              |
| Nikokar, 2010     | Iran         | Not stated | 17                                          | Cross-sectional     | Hospital                                     | All types of HCWs                                                             | TST        | 185                    | P: Low               |

| Author, Year         | Country  | Study year | TB Incidence at the study year <sup>a</sup> | Type of study         | Type of setting     | Type of participant                                                                                                            | Test used  | Number of participants | Quality Summary |
|----------------------|----------|------------|---------------------------------------------|-----------------------|---------------------|--------------------------------------------------------------------------------------------------------------------------------|------------|------------------------|-----------------|
| Nikolova, 2013       | Bulgaria | 2009       | 45                                          | Cross-sectional       | Dispensary          | All types of HCWs                                                                                                              | IGRA       | 21                     | P: Low          |
| Nonghanphithak, 2016 | Thailand | 2013-2015  | 171                                         | Cross-sectional       | General Hospital    | All types of HCWs                                                                                                              | IGRA       | 112                    | P: Low          |
| Ozdemir, 2006        | Turkey   | 2005       | 33                                          | Cross-sectional       | Hospital            | All types of HCWs                                                                                                              | TST        | 39                     | P: Low          |
| Ozdemir, 2007        | Turkey   | 2005       | 33                                          | Cross-sectional       | General Hospital    | All types of HCWs                                                                                                              | TST & IGRA | 76                     | P: Medium       |
| Ozsoy, 2010          | Turkey   | Not stated | 25                                          | Cross-sectional       | Autopsy facility    | All types of HCWs                                                                                                              | TST        | 31                     | P: Low          |
| Pai, 2006            | India    | 2004-2005  | 281                                         | Cohort, prospective   | Hospital            | Nursing and medical students                                                                                                   | TST & IGRA | 147                    | P: -, I: Medium |
| Perez-Lu, 2013       | Peru     | 2002-2009  | 150                                         | Cohort, retrospective | University hospital | All types of HCSs: veterinary, dentistry, nursing, medical technology, medicine, education, sciences, and health administrator | TST        | 4842                   | P: Low, I: Low  |
| Powell, 2011         | Viet Nam | 2009       | 159                                         | Cross-sectional       | Hospital            | All types of HCWs                                                                                                              | TST        | 956                    | P: Medium       |

| Author, Year        | Country                        | Study year | TB Incidence at the study year <sup>a</sup> | Type of study         | Type of setting                                   | Type of participant          | Test used  | Number of participants | Quality Summary   |
|---------------------|--------------------------------|------------|---------------------------------------------|-----------------------|---------------------------------------------------|------------------------------|------------|------------------------|-------------------|
| Rabahi, 2007        | Brazil                         | 2001-2004  | 52                                          | Cohort, prospective   | Hospital                                          | All types of HCWs            | TST        | 437                    | P: Low, I: Medium |
| Rafiza, 2011        | Malaysia                       | 2008-2009  | 73                                          | Cross-sectional       | Hospital                                          | All types of HCWs            | TST & IGRA | 953                    | P: High           |
| Rafiza, 2012        | Malaysia                       | 2008-2009  | 73                                          | Cohort, prospective   | Hospital                                          | All types of HCWs            | IGRA       | 954                    | P: -, I: Medium   |
| Ratnatunga, 2015    | Sri Lanka                      | 2013       | 66                                          | Cross-sectional       | Chest clinic                                      | All types of HCWs            | TST & IGRA | 36                     | P: Medium         |
| Rodrigues, 2009     | Brazil                         | 2007       | 45                                          | Cross-sectional       | Community and within the national TB control plan | Community health workers     | TST        | 30                     | P: Medium         |
| Rogério, 2013       | Brazil (article in Portuguese) | 2010-2011  | 44                                          | Cross-sectional       | University Hospital                               | Medical and Nursing students | TST        | 225                    | P: High           |
| Rogério, 2015       | Brazil (article in Portuguese) | 2011-2012  | 43                                          | Cross-sectional       | Primary care unit                                 | Community health workers     | TST        | 307                    | P: High           |
| Rutanga, 2015       | Rwanda                         | 2010       | 88                                          | Cross-sectional       | Hospital, Health centers                          | All types of HCWs            | TST        | 1023                   | P: Medium         |
| Salmanzadeh, 2016   | Iran                           | Not stated | 14                                          | Cross-sectional       | General Hospital                                  | Nurses                       | TST & IGRA | 87                     | P: Low            |
| Sawanyawisuth, 2012 | Thailand                       | 2001-2009  | 221                                         | Cohort, retrospective | Hospital                                          | All types of HCWs            | TST        | 1025                   | P: -, I: Low      |
| Sawhney, 2015       | India                          | 2011-2013  | 234                                         | Cross-sectional       | General Hospital                                  | All types of HCWs            | TST        | 100                    | P: Low            |



| <b>Author, Year</b> | <b>Country</b> | <b>Study year</b> | <b>TB Incidence at the study year <sup>a</sup></b> | <b>Type of study</b> | <b>Type of setting</b>     | <b>Type of participant</b>    | <b>Test used</b> | <b>Number of participants</b> | <b>Quality Summary</b> |
|---------------------|----------------|-------------------|----------------------------------------------------|----------------------|----------------------------|-------------------------------|------------------|-------------------------------|------------------------|
| Severo, 2011        | Brazil         | 2009-2010         | 45                                                 | Cross-sectional      | Hospital                   | Nurses                        | TST              | 55                            | P: High                |
| Sharifi-Mood, 2006  | Iran           | 2005              | 16                                                 | Cross-sectional      | Hospital                   | All types of HCWs             | TST              | 100                           | P: Low                 |
| Siddiqi, 2012       | Philippines    | 2010              | 531                                                | Cross-sectional      | General Hospital           | All types of HCWs             | IGRA             | 31                            | P: Low                 |
| Taheri, 2013        | Iran           | 2009-2010         | 17                                                 | Cross-sectional      | General Hospital           | Lab personnel & radiographers | TST              | 89                            | P: Low                 |
| Talebi-Taher, 2011  | Iran           | 2009-2010         | 17                                                 | Cross-sectional      | General Hospital           | All types of HCWs             | TST & IGRA       | 200                           | P: Low                 |
| Thuong, 2016        | Vietnam        | Not stated        | 133                                                | Cross-sectional      | TB Hospital and TB centers | All types of HCWs             | IGRA             | 109                           | P: Low                 |
| Topic, 2009         | Croatia        | 2007              | 25                                                 | Cross-sectional      | Children Hospital          | All types of HCWs             | TST & IGRA       | 54                            | P: Low                 |
| van Rie, 2013       | South Africa   | 2008              | 977                                                | Cross-sectional      | General Hospital           | HCWs and medical students     | TST & IGRA       | 199                           | P: Low                 |
| Wei, 2013           | China          | 2009              | 82                                                 | Cross-sectional      | Thoracic Hospital          | All types of HCWs             | TST & IGRA       | 210                           | P: Low                 |
| Whitaker, 2013      | Georgia        | 2009-2011         | 127                                                | Cohort, prospective  | Clinic                     | All types of HCWs             | TST & IGRA       | 320                           | P: Low, I: Low         |
| Yalcin, 2005        | Turkey         | Not stated        | 33                                                 | Cross-sectional      | Not stated                 | All types of HCWs             | TST              | 89                            | P: Medium              |

| Author, Year   | Country | Study year | TB Incidence at the study year <sup>a</sup> | Type of study       | Type of setting                                 | Type of participant          | Test used | Number of participants | Quality Summary |
|----------------|---------|------------|---------------------------------------------|---------------------|-------------------------------------------------|------------------------------|-----------|------------------------|-----------------|
| Zhang, 2013    | China   | 2012       | 74                                          | Cross-sectional     | TB Hospital, TB and Thoracic Research Institute | All types of HCWs            | IGRA      | 755                    | P: High         |
| Zhou, 2014     | China   | 2011       | 76                                          | Cross-sectional     | Hospital                                        | All types of HCWs            | TST       | 529                    | P: Medium       |
| Zhu, 2014      | China   | 2005-2008  | 88                                          | Cross-sectional     | Pulmonary Hospital                              | All types of HCWs            | IGRA      | 20                     | P: Low          |
| Zwerling, 2013 | India   | 2007-2009  | 261                                         | Cohort, prospective | Hospital                                        | Nursing and medical students | IGRA      | 226                    | P: Low, P: Low  |

<sup>a</sup> All figures were taken for the year of the study or the average if several years from WHO estimation for incidence of all forms of TB, in general population, in the country per 100,000 population per year. If the study years were not reported, we use year when the study published

HCWs, health care workers

HCSs, health care students

P, prevalence

I, Incidence

NTP, National TB program

**Table S4a. Prevalence of LTBI in HCWs measured by TST**

| Study (Author, Year, Country) | Type of participants          | TST Cut-off/induration size                   | TST positivity rate |                 |      |           | Proportion of BCG scar or history of BCG vaccination (%) |
|-------------------------------|-------------------------------|-----------------------------------------------|---------------------|-----------------|------|-----------|----------------------------------------------------------|
|                               |                               |                                               | Number tested       | Number positive | %    | 95% CI    |                                                          |
| Adams, 2015, South Africa     | All types of HCWs             | 10 mm in non HIV and 5 mm in HIV participants | 147                 | 123             | 83.7 | 76.9-88.8 | 98                                                       |
| Agaya, 2015, Kenya            | All types of HCWs             | 10 mm                                         | 898                 | 534             | 59.5 | 56.2-62.6 | -                                                        |
| Babayigit, 2014, Turkey       | All types of HCWs             | 15 mm                                         | 96                  | 32              | 33.3 | 24.0-43.7 | 100                                                      |
| Belo, 2017, Mozambique        | All types of HCWs             | 10 mm                                         | 209                 | 72              | 34.4 | 28.0-41.3 | 72.7                                                     |
| Borroto, 2011, Cuba           | All types of HCWs             | 10 mm                                         | 350                 | 54              | 15.4 | 11.9-19.5 | 76.3                                                     |
| Bozkanat, 2016, Turkey        | All types of HCWs             | 15 mm                                         | 34                  | 20              | 58.8 | 40.7-75.4 | 94.1                                                     |
| Caglayan, 2011, Turkey        | All types of HCWs             | 15 mm                                         | 78                  | 57              | 73.1 | 61.8-82.5 | -                                                        |
| Calixto-Aguilar, 2016, Cuba   | Medical students              | 10 mm                                         | 548                 | 37              | 6.7  | 47.9-91.9 | -                                                        |
| Christopher, 2010, India      | Nursing students              | 10 mm                                         | 436                 | 219             | 50.2 | 45.4-55.0 | 76.9                                                     |
| Chung-Delgado, 2012, Peru     | Medical students              | 10 mm                                         | 547                 | 79              | 14.4 | 11.5-17.4 | -                                                        |
| Corbett, 2007, Zimbabwe       | Nursing students              | 10 mm                                         | 351                 | 183             | 52.1 | 46.9-57.3 | -                                                        |
| Da Costa, 2006, Brazil        | All types of HCWs             | 10 mm                                         | 31                  | 13              | 41.9 | 24.5-60.9 | -                                                        |
| Dagnew, 2012, Ethiopia        | Medical, Paramedical students | 10 mm                                         | 107                 | 50              | 46.7 | 37.0-56.6 | 44.9                                                     |

| Study (Author, Year, Country) | Type of participants                   | TST Cut-off/induration size | TST positivity rate |                 |      |           | Proportion of BCG scar or history of BCG vaccination (%) |
|-------------------------------|----------------------------------------|-----------------------------|---------------------|-----------------|------|-----------|----------------------------------------------------------|
|                               |                                        |                             | Number tested       | Number positive | %    | 95% CI    |                                                          |
| de Miranda, 2012, Brazil      | All types of HCWs                      | 10 mm                       | 251                 | 129             | 51.4 | 45.2-57.7 | 40.2                                                     |
| de Oliveira, 2007, Brazil     | All types of HCWs                      | 10 mm                       | 194                 | 75              | 38.7 | 31.8-45.9 | -                                                        |
| de Souza, 2014, Brazil        | All types of HCWs                      | 5 mm                        | 632                 | 384             | 60.8 | 56.8-64.6 | 86.4                                                     |
| de Souza, 2014, Brazil        | All types of HCWs                      | 10 mm                       | 632                 | 252             | 39.9 | 36.0-43.8 | -                                                        |
| El-Sokkary, 2015, Egypt       | Nurses and Lab personnel               | 10 mm                       | 132                 | 78              | 59.1 | 50.2-67.6 | 92.4                                                     |
| Emadi-Koochak, 2009, Iran     | Medical students and pharmacy students | 10 mm                       | 256                 | 17              | 7    | 4.2-10.4  | -                                                        |
| Encinales, 2010, Colombia     | All types of HCWs                      | 5 mm                        | 150                 | 77              | 51.3 | 43.0-59.6 | 90                                                       |
| Franco, 2006, Brazil          | Nurses                                 | 10 mm                       | 169                 | 101             | 59.8 | 51.9-67.2 | 80                                                       |
| Gutierrez, 2012, Cuba         | All types of HCWs                      | 10 mm                       | 183                 | 93              | 50.8 | 43.4-58.2 | -                                                        |
| He, 2010, China               | All types of HCWs                      | 10 mm                       | 2153                | 1106            | 51.4 | 49.2-53.5 | 36.1                                                     |
| He, 2012, China               | All types of HCWs                      | 5 mm                        | 924                 | 637             | 69   | 65.8-71.9 | 34                                                       |
| He, 2012, China               | All types of HCWs                      | 10 mm                       | 924                 | 499             | 54   | 50.7-57.3 | -                                                        |
| He, 2015, China               | Village doctor                         | 10 mm                       | 875                 | 171             | 19.5 | 17.1-22.3 | 89                                                       |

| Study (Author, Year, Country)   | Type of participants               | TST Cut-off/induration size | TST positivity rate |                 |      |           | Proportion of BCG scar or history of BCG vaccination (%) |
|---------------------------------|------------------------------------|-----------------------------|---------------------|-----------------|------|-----------|----------------------------------------------------------|
|                                 |                                    |                             | Number tested       | Number positive | %    | 95% CI    |                                                          |
| Hefzy, 2016, Egypt              | Physicians, nurse, and housekeeper | 10 mm                       | 44                  | 6               | 13.6 | 5.2-27.4  | 100                                                      |
| Hohmuth, 2006, Peru             | All types of HCSs                  | 10 mm                       | 559                 | 117             | 20.9 | 17.8-24.5 | -                                                        |
| Islam, 2014, Bangladesh         | All types of HCWs                  | 10 mm                       | 449                 | 242             | 53.9 | 49.2-58.6 | 82                                                       |
| Kargi, 2017, Turkey             | All types of HCWs                  | 10 mm                       | 100                 | 42              | 42   | 32.2-52.3 | 42                                                       |
| Khawcharoenporn, 2009, Thailand | Medical students                   | 10 mm                       | 166                 | 123             | 74.1 | 66.7-80.6 | 58.2                                                     |
| Kiertiburanakul, 2012, Thailand | Nurses, Nursing assistants         | 10 mm                       | 373                 | 258             | 69.2 | 63.8-68.7 | 81.4                                                     |
| Kiertiburanakul, 2012, Thailand | Nursing and medical students       | 10 mm                       | 1065                | 695             | 65.3 | 62.3-68.1 | -                                                        |
| Khawcharoenporn, 2016, Thailand | All types of HCWs                  | 13 mm                       | 260                 | 114             | 43.8 | 37.7-50.1 | 78                                                       |
| Li-fan, 2013, China             | All types of HCWs                  | 10 mm                       | 96                  | 53              | 55.2 | 45.3-64.8 | -                                                        |
| Li-fan, 2013, China             | All types of HCWs                  | 5 mm                        | 96                  | 70              | 72.9 | 63.3-80.8 | -                                                        |
| Lien, 2009, Viet Nam            | All types of HCWs                  | 10 mm                       | 288                 | 176             | 61.1 | 55.2-66.8 | 95                                                       |
| Lien, 2009, Viet Nam            | All types of HCWs                  | 10 mm                       | 288                 | 191             | 66.3 | 60.5-71.8 | 95                                                       |
| Lopes, 2008, Brazil             | Nurses                             | 10 mm                       | 128                 | 89              | 69.5 | 60.7-77.2 | -                                                        |
| Lou, 2015, Uganda               | All types of HCSs                  | 10 mm                       | 288                 | 130             | 45.1 | 39.3-51.1 | 71.2                                                     |

| Study (Author, Year, Country) | Type of participants         | TST Cut-off/induration size                    | TST positivity rate |                 |      |           | Proportion of BCG scar or history of BCG vaccination (%) |
|-------------------------------|------------------------------|------------------------------------------------|---------------------|-----------------|------|-----------|----------------------------------------------------------|
|                               |                              |                                                | Number tested       | Number positive | %    | 95% CI    |                                                          |
| Maciel, 2007, Brazil          | Nursing and medical students | 10 mm                                          | 605                 | 114             | 18.8 | 15.8-22.2 | 98.7                                                     |
| Mirtskulava, 2008, Georgia    | All types of HCWs            | 10 mm                                          | 265                 | 177             | 66.8 | 60.8-72.4 | 92                                                       |
| Moreira, 2010, Brazil         | Community health workers     | 10 mm                                          | 72                  | 11              | 15.3 | 8.8-25.3  | -                                                        |
| Mostafavi, 2016, Iran         | Lab personnel                | 10 mm                                          | 177                 | 25              | 14.1 | 9.4-20.1  | 89.8                                                     |
| Munisamy, 2017, Malaysia      | All types of HCWs            | 15 mm                                          | 399                 | 184             | 46.1 | 41.1-51.1 | -                                                        |
| Nasehi, 2017, Iran            | Lab personnel                | 10 mm                                          | 689                 | 168             | 24.4 | 21.3-27.7 | -                                                        |
| Nasehi, 2017, Iran            | Low risk HCWs                | 10 mm                                          | 317                 | 47              | 14.8 | 11.3-19.2 | -                                                        |
| Nikokar, 2010, Iran           | All types of HCWs            | 10 mm                                          | 185                 | 125             | 67.6 | 60.3-74.3 | -                                                        |
| Ozdemir, 2006, Turkey         | All types of HCWs            | 15 mm                                          | 39                  | 28              | 71.8 | 55.1-84.9 | 100                                                      |
| Ozdemir, 2007, Turkey         | All types of HCWs            | 15 mm                                          | 76                  | 41              | 53.9 | 42.1-65.5 | -                                                        |
| Ozsoy, 2010, Turkey           | All types of HCWs            | 15 mm with BCG scar and 10 mm with no BCG scar | 31                  | 26              | 83.9 | 66.3-94.5 | 93.5                                                     |
| Perez-Lu, 2013, Peru          | All types of HCWs            | 10 mm                                          | 4842                | 49              | 1    | 0.6-1.3   | 70.9                                                     |
| Powell, 2011, Viet nam        | All types of HCWs            | 10 mm                                          | 956                 | 380             | 39.7 | 36.6-42.9 | 31                                                       |

| Study (Author, Year, Country) | Type of participants         | TST Cut-off/induration size | TST positivity rate |                 |      |           | Proportion of BCG scar or history of BCG vaccination (%) |
|-------------------------------|------------------------------|-----------------------------|---------------------|-----------------|------|-----------|----------------------------------------------------------|
|                               |                              |                             | Number tested       | Number positive | %    | 95% CI    |                                                          |
| Rabahi, 2007, Brazil          | All types of HCWs            | 10 mm                       | 437                 | 211             | 48.3 | 43.6-53.0 | -                                                        |
| Rafiza, 2011, Malaysia        | All types of HCWs            | 10 mm                       | 95                  | 56              | 58.9 | 48.4-68.9 | 99.7                                                     |
| Rafiza, 2011, Malaysia        | All types of HCWs            | 15 mm                       | 95                  | 16              | 16.8 | 9.9-25.9  | 99.7                                                     |
| Ratnatunga, 2015, Sri Lanka   | All types of HCWs            | 10 mm                       | 36                  | 17              | 47.2 | 30.4-64.5 | -                                                        |
| Rodrigues, 2009, Brazil       | Community health workers     | 10 mm                       | 30                  | 8               | 26.7 | 12.3-45.9 | 93.3                                                     |
| Rogério, 2013, Brazil         | Medical and Nursing students | 10 mm                       | 225                 | 54              | 24   | 18.6-30.1 | 97.8                                                     |
| Rogério, 2015, Brazil         | Community health workers     | 10 mm                       | 307                 | 116             | 37.3 | 31.0-42.0 | 89.2                                                     |
| Rogério, 2015, Brazil         | Community health workers     | 5 mm                        | 307                 | 180             | 57.8 | 52.0-63.0 | -                                                        |
| Rutanga, 2015, Rwanda         | All types of HCWs            | 10 mm                       | 1023                | 635             | 62.1 | 59.0-65.1 | -                                                        |
| Salmanzadeh, 2016, Iran       | Nurses                       | Not stated                  | 87                  | 31              | 35.6 | 25.6-46.6 | -                                                        |
| Sawhney, 2015, India          | All types of HCWs            | 10 mm                       | 100                 | 20              | 20   | 12.7-29.2 | 92                                                       |
| Severo, 2011, Brazil          | Nurses                       | 10 mm                       | 55                  | 26              | 47.3 | 33.7-61.2 | 98.2                                                     |

| Study (Author, Year, Country) | Type of participants                   | TST Cut-off/induration size | TST positivity rate |                 |      |           | Proportion of BCG scar or history of BCG vaccination (%) |
|-------------------------------|----------------------------------------|-----------------------------|---------------------|-----------------|------|-----------|----------------------------------------------------------|
|                               |                                        |                             | Number tested       | Number positive | %    | 95% CI    |                                                          |
| Sharifi-Mood, 2006, Iran      | All types of HCWs                      | Not stated                  | 100                 | 55              | 55   | 44.7-64.9 | -                                                        |
| Taheri, 2013, Iran            | Lab personnel & radiographers          | 10 mm                       | 89                  | 7               | 7.9  | 5.52-19.7 | 100                                                      |
| Talebi-Taher, 2011, Iran      | All types of HCWs                      | 10 mm                       | 200                 | 105             | 52.5 | 45.3-59.6 | 100                                                      |
| Topic, 2009, Croatia          | All types of HCWs                      | 10 mm                       | 54                  | 34              | 62.9 | 48.7-75.7 | 100                                                      |
| Topic, 2009, Croatia          | All types of HCWs                      | 5 mm                        | 54                  | 45              | 83.3 | 70.7-92.1 | 100                                                      |
| Topic, 2009, Croatia          | All types of HCWs                      | 15 mm                       | 54                  | 19              | 35.2 | 22.7-49.4 | 100                                                      |
| van Rie, 2013, South Africa   | HCWs                                   | 10 mm                       | 120                 | 68              | 56.7 | 47.3-65.7 | -                                                        |
| van Rie, 2013, South Africa   | Medical students                       | 10 mm                       | 79                  | 21              | 26.6 | 17.3-27.7 | -                                                        |
| Wei, 2013, China              | All types of HCWs                      | 10 mm                       | 85                  | 83              | 97.6 | 91.7-99.7 | 94.3                                                     |
| Whitaker, 2013, Georgia       | All types of HCWs and medical students | 10 mm                       | 308                 | 193             | 62.7 | 57.1-67.9 | -                                                        |
| Yalcin, 2005, Turkey          | All types of HCWs                      | 10 mm                       | 89                  | 21              | 23.6 | 15.2-33.8 | -                                                        |
| Zhou, 2014, China             | All types of HCWs                      | 10 mm                       | 529                 | 232             | 43.8 | 39.6-48.2 | 66.7                                                     |

HCWs, health care workers

HCSs, health care students



**Table S4b. Prevalence of LTBI in HCWs measured by IGRA**

| Study (Author, Year, Country)   | Type of participants                | IGRA used | IGRA positivity rate |                    |      |           | Proportion of BCG scar or history of BCG vaccination (%) |
|---------------------------------|-------------------------------------|-----------|----------------------|--------------------|------|-----------|----------------------------------------------------------|
|                                 |                                     |           | Number of tested     | Number of positive | %    | 95% CI    |                                                          |
| Adams, 2015, South Africa       | All types of HCWs                   | QFT-GIT   | 335                  | 231                | 68.9 | 63.7-73.9 | 92                                                       |
| Adams, 2015, South Africa       | All types of HCWs                   | T-SPOT.TB | 317                  | 198                | 62.5 | 56.9-67.8 | -                                                        |
| Babayigit, 2014, Turkey         | All types of HCWs                   | QFT-Gold  | 96                   | 19                 | 19.8 | 12.4-29.2 | 100                                                      |
| Bandyopadhyay, 2010, India      | Nursing and medical students        | QFT-Gold  | 50                   | 0                  | 0    | -         | -                                                        |
| Bozkanat, 2016, Turkey          | All types of HCWs                   | QFT-Gold  | 34                   | 7                  | 20.6 | 8.7-37.9  | 94.1                                                     |
| Caglayan, 2011, Turkey          | All types of HCWs                   | QFT-Gold  | 78                   | 34                 | 43.6 | 32.4-55.3 | -                                                        |
| Dagnew, 2012, Ethiopia          | Medical and paramedical students    | QFT-Gold  | 107                  | 47                 | 43.9 | 34.3-53.9 | 44.9                                                     |
| de Souza, 2014, Brazil          | All types of HCWs                   | QFT-Gold  | 632                  | 252                | 27.2 | 23.8-30.9 | 86.4                                                     |
| Drobniewski, 2007, Russia       | All type of HCWs                    | QFT-Gold  | 262                  | 107                | 40.8 | 35.0-46.9 | 81.3                                                     |
| Drobniewski, 2007, Russia       | Medical students                    | QFT-Gold  | 238                  | 24                 | 10.1 | 6.7-14.4  | 87.8                                                     |
| El-Sokkary, 2015, Egypt         | Nurses and Lab personnel            | QFT-Gold  | 132                  | 38                 | 28.8 | 21.2-37.3 | 92.4                                                     |
| Escombe, 2010, Peru             | All types of HCWs                   | QFT-GIT   | 70                   | 39                 | 56   | 43.3-67.6 | -                                                        |
| Gupta, 2015, India              | All types of HCWs                   | T-SPOT    | 40                   | 18                 | 45   | 29.3-61.5 | -                                                        |
| He, 2012, China                 | All types of HCWs                   | QFT-Gold  | 999                  | 679                | 68   | 64.9-70.9 | 34                                                       |
| He, 2015, China                 | Village doctor                      | QFT-GIT   | 866                  | 398                | 45.9 | 42.6-49.3 | 36.4                                                     |
| Hefzy, 2016, Egypt              | Physicians, nurses, and housekeeper | QFT-Gold  | 39                   | 4                  | 10.2 | 2.9-24.2  | 100                                                      |
| Kargi, 2017, Turkey             | All types of HCWs                   | QFT-Gold  | 100                  | 23                 | 23   | 15.2-32.5 | 42                                                       |
| Khawcharoenporn, 2016, Thailand | All types of HCWs                   | QFT-Gold  | 260                  | 52                 | 20   | 15.3-25.4 | 78                                                       |
| Li-fan, 2013, China             | All types of HCWs                   | T-SPOT.TB | 101                  | 29                 | 28.7 | 19.9-37.5 | 98                                                       |
| Lien, 2009, Viet Nam            | All types of HCWs                   | QFT-Gold  | 300                  | 142                | 47.3 | 41.6-53.2 | 95                                                       |

| Study (Author, Year, Country)  | Type of participants                   | IGRA used | IGRA positivity rate |                    |      |           | Proportion of BCG scar or history of BCG vaccination (%) |
|--------------------------------|----------------------------------------|-----------|----------------------|--------------------|------|-----------|----------------------------------------------------------|
|                                |                                        |           | Number of tested     | Number of positive | %    | 95% CI    |                                                          |
| Liu, 2015, China               | All types of HCWs                      | QFT-Gold  | 115                  | 48                 | 41.7 | 32.6-51.3 | -                                                        |
| Mirtskulava, 2008, Georgia     | All types of HCWs                      | QFT-Gold  | 265                  | 159                | 60   | 53.8-65.9 | 92                                                       |
| Mostafavi, 2016, Iran          | Lab personnel                          | QFT-Gold  | 177                  | 33                 | 18.6 | 13.2-25.2 | 89.8                                                     |
| Nikolova, 2013, Bulgaria       | All types of HCWs                      | QFT-Gold  | 21                   | 10                 | 47.6 | 25.7-70.2 | 100                                                      |
| Nonghanphithak, 2016, Thailand | All types of HCWs                      | QFT-Gold  | 112                  | 21                 | 18.8 | 11.5-25.9 | 65.2                                                     |
| Ozdemir, 2007, Turkey          | All types of HCWs                      | QFT-Gold  | 76                   | 65                 | 85.5 | 75.6-92.5 | -                                                        |
| Rafiza, 2011, Malaysia         | All types of HCWs                      | QFT-Gold  | 953                  | 101                | 10.6 | 8.6-12.6  | 99.7                                                     |
| Ratnatunga, 2015, Sri Lanka    | All types of HCWs                      | T-SPOT    | 38                   | 6                  | 15.8 | 6.0-31.2  | -                                                        |
| Salmanzadeh, 2016, Iran        | Nurses                                 | QFT-Gold  | 87                   | 27                 | 31   | 21.5-41.9 | -                                                        |
| Siddiqi, 2012, Philippines     | All types of HCWs                      | QFT-Gold  | 31                   | 15                 | 48.4 | 30.2-66.9 | -                                                        |
| Talebi-Taher, 2011, Iran       | All types of HCWs                      | QFT-Gold  | 200                  | 17                 | 8.5  | 5.0-13.2  | 100                                                      |
| Thuong, 2016, Vietnam          | All types of HCWs                      | QFT-Gold  | 109                  | 41                 | 37.6 | 28.5-47.4 | 49.5                                                     |
| Topic, 2009, Croatia           | All types of HCWs                      | QFT-Gold  | 54                   | 17                 | 31.5 | 19.5-45.6 | 100                                                      |
| van Rie, 2013, South Africa    | All types of HCWs                      | QFT-Gold  | 120                  | 83                 | 69.2 | 60.0-72.3 | -                                                        |
| van Rie, 2013, South Africa    | Medical students                       | QFT-Gold  | 79                   | 12                 | 15.2 | 8.1-25.0  | -                                                        |
| Wei, 2013, China               | All types of HCWs                      | QFT-Gold  | 210                  | 161                | 76.7 | 70.4-82.2 | 94.3                                                     |
| Whitaker, 2013, Georgia        | All types of HCWs and medical students | QFT-GIT   | 319                  | 146                | 45.8 | 40.2-51.4 | 89                                                       |
| Zhang, 2013, China             | All types of HCWs                      | T-SPOT    | 755                  | 254                | 33.6 | 30.2-37.0 | 100                                                      |
| Zhu, 2014, China               | All types of HCWs                      | T-SPOT    | 20                   | 6                  | 30   | 11.9-54.3 | -                                                        |
| Zwerling, 2013, India          | Nursing and medical students           | QFT-GIT   | 226                  | 64                 | 28.3 | 22.5-34.7 | 75.6                                                     |

HCWs, health care workers

HCSs, health care students

**Table S4c. Prevalence of LTBI measured by TST and by IGRA (Stratified by type of participants and TB incidence per 100,000)**

| Study description                         | Prevalence of LTBI - all studies |                                   |                  |                         | Prevalence of LTBI - high and medium quality studies |                                   |                  |                         |
|-------------------------------------------|----------------------------------|-----------------------------------|------------------|-------------------------|------------------------------------------------------|-----------------------------------|------------------|-------------------------|
|                                           | Study data                       |                                   | Pooled estimates |                         | Study data                                           |                                   | Pooled estimates |                         |
|                                           | Number of studies                | IQ range for prevalence estimates | Prevalence (%)   | 95% confidence interval | Number of studies                                    | IQ range for prevalence estimates | Prevalence (%)   | 95% confidence interval |
| <b>Prevalence of LTBI measured by TST</b> |                                  |                                   |                  |                         |                                                      |                                   |                  |                         |
| Health care workers                       |                                  |                                   |                  |                         |                                                      |                                   |                  |                         |
| ≥ 300                                     | 4                                | 51-66                             | 59               | 41-77                   | 3                                                    | 47-72                             | 59               | 36-82                   |
| 200-299                                   | 3                                | 37-62                             | 48               | 24-72                   | 1                                                    | -                                 | 54               | 44-49                   |
| 100-199                                   | 4                                | 43-66                             | 54               | 39-69                   | 2                                                    | 46-60                             | 46               | 44-49                   |
| 25-99                                     | 29                               | 46-62                             | 53               | 46-61                   | 18                                                   | 44-59                             | 48               | 40-56                   |
| 0-24                                      | 13                               | 15-53                             | 36               | 26-47                   | 5                                                    | 15-51                             | 32               | 19-46                   |
| Physicians                                |                                  |                                   |                  |                         |                                                      |                                   |                  |                         |
| ≥ 300                                     | 0                                | -                                 | -                | -                       | 0                                                    | -                                 | -                | -                       |
| 200-299                                   | 1                                | -                                 | 58               | 39-74                   | 1                                                    | -                                 | 58               | 39-74                   |
| 100-199                                   | 1                                | -                                 | 67               | 54-77                   | 0                                                    | -                                 | -                | -                       |
| 25-99                                     | 4                                | 40-56                             | 49               | 11-87                   | 3                                                    | 33-63                             | 49               | 2-95                    |
| 0-24                                      | 5                                | 41-48                             | 40               | 29-52                   | 2                                                    | 30-45                             | 31               | 22-40                   |
| Nurses                                    |                                  |                                   |                  |                         |                                                      |                                   |                  |                         |
| ≥ 300                                     | 1                                | -                                 | 35               | 25-47                   | 1                                                    | -                                 | 35               | 25-47                   |
| 200-299                                   | 2                                | 59-73                             | 65               | 59-70                   | 1                                                    | -                                 | 52               | 45-65                   |
| 100-199                                   | 1                                | -                                 | 68               | 57-77                   | 0                                                    | -                                 | -                | -                       |
| 25-99                                     | 9                                | 49-67                             | 60               | 53-66                   | 5                                                    | 60-70                             | 63               | 56-70                   |
| 0-24                                      | 7                                | 33-55                             | 44               | 30-57                   | 3                                                    | 39-62                             | 47               | 16-78                   |

| Study description                         | Prevalence of LTBI - all studies |                                   |                  |                         | Prevalence of LTBI - high and medium quality studies |                                   |                  |                         |
|-------------------------------------------|----------------------------------|-----------------------------------|------------------|-------------------------|------------------------------------------------------|-----------------------------------|------------------|-------------------------|
|                                           | Study data                       |                                   | Pooled estimates |                         | Study data                                           |                                   | Pooled estimates |                         |
|                                           | Number of studies                | IQ range for prevalence estimates | Prevalence (%)   | 95% confidence interval | Number of studies                                    | IQ range for prevalence estimates | Prevalence (%)   | 95% confidence interval |
| <b>Prevalence of LTBI measured by TST</b> |                                  |                                   |                  |                         |                                                      |                                   |                  |                         |
| Allied health professionals               |                                  |                                   |                  |                         |                                                      |                                   |                  |                         |
| ≥ 300                                     | 2                                | 38-47                             | 37               | 29-44                   | 1                                                    | -                                 | 34               | 26-42                   |
| 200-299                                   | 2                                | 61-64                             | 64               | 59-69                   | 1                                                    | -                                 | 59               | 47-70                   |
| 100-199                                   | 1                                | -                                 | 66               | 47-80                   | 0                                                    | -                                 | -                | -                       |
| 25-99                                     | 8                                | 31-64                             | 50               | 39-62                   | 8                                                    | 29-64                             | 46               | 30-61                   |
| 0-24                                      | 8                                | 22-44                             | 31               | 21-41                   | 5                                                    | 14-40                             | 25               | 14-36                   |
| General services                          |                                  |                                   |                  |                         |                                                      |                                   |                  |                         |
| ≥ 300                                     | 0                                | -                                 | -                |                         | 0                                                    | -                                 | -                |                         |
| 200-299                                   | 1                                | -                                 | 53               | 45-61                   | 1                                                    | -                                 | 53               | 45-61                   |
| 100-199                                   | 0                                | -                                 | -                | -                       | 0                                                    | -                                 | -                | -                       |
| 25-99                                     | 3                                | 40-54                             | 50               | 40-60                   | 2                                                    | 52-55                             | 55               | 50-60                   |
| 0-24                                      | 3                                | 33-53                             | 39               | 10-69                   | 2                                                    | 24-43                             | 23               | 17-28                   |
| Health care students                      |                                  |                                   |                  |                         |                                                      |                                   |                  |                         |
| ≥ 300                                     | 2                                | 33-46                             | 46               | 42-51                   | 1                                                    | -                                 | 52               | 47-57                   |
| 200-299                                   | 5                                | 47-65                             | 56               | 46-67                   | 3                                                    | 48-62                             | 56               | 41-72                   |
| 100-199                                   | 4                                | 5-16                              | 11               | 2-19                    | 3                                                    | 11-18                             | 14               | 6-22                    |
| 25-99                                     | 2                                | 20-23                             | 20               | 17-23                   | 2                                                    | 20-23                             | 20               | 17-23                   |
| 0-24                                      | 1                                | -                                 | 7                | 4-10                    | 0                                                    | -                                 | -                | -                       |

| Study description                          | Prevalence of LTBI - all studies |                                   |                  |                         | Prevalence of LTBI - high and medium quality studies |                                   |                  |                         |
|--------------------------------------------|----------------------------------|-----------------------------------|------------------|-------------------------|------------------------------------------------------|-----------------------------------|------------------|-------------------------|
|                                            | Study data                       |                                   | Pooled estimates |                         | Study data                                           |                                   | Pooled estimates |                         |
|                                            | Number of studies                | IQ range for prevalence estimates | Prevalence (%)   | 95% confidence interval | Number of studies                                    | IQ range for prevalence estimates | Prevalence (%)   | 95% confidence interval |
| <b>Prevalence of LTBI measured by IGRA</b> |                                  |                                   |                  |                         |                                                      |                                   |                  |                         |
| Health care workers                        |                                  |                                   |                  |                         |                                                      |                                   |                  |                         |
| ≥ 300                                      | 3                                | 59-69                             | 66               | 58-74                   | 1                                                    | -                                 | 69               | 64-74                   |
| 200-299                                    | 1                                | -                                 | 45               | 31-60                   | 0                                                    | -                                 | -                | -                       |
| 100-199                                    | 6                                | 24-54                             | 40               | 25-55                   | 1                                                    | -                                 | 47               | 42-53                   |
| 25-99                                      | 16                               | 28-46                             | 41               | 29-54                   | 8                                                    | 25-51                             | 41               | 22-60                   |
| 0-24                                       | 7                                | 14-26                             | 20               | 13-26                   | 2                                                    | 21-26                             | 22               | 118-27                  |
| Physicians                                 |                                  |                                   |                  |                         |                                                      |                                   |                  |                         |
| ≥ 300                                      | 0                                | -                                 | -                | -                       | 0                                                    | -                                 | -                | -                       |
| 200-299                                    | 0                                | -                                 | -                | -                       | 0                                                    | -                                 | -                | -                       |
| 100-199                                    | 4                                | 42-58                             | 45               | 18-71                   | 1                                                    | -                                 | 58               | 46-69                   |
| 25-99                                      | 6                                | 27-44                             | 40               | 23-56                   | 5                                                    | 34-46                             | 45               | 29-61                   |
| 0-24                                       | 3                                | 12-22                             | 15               | 1-29                    | 0                                                    | -                                 | -                | -                       |
| Nurses                                     |                                  |                                   |                  |                         |                                                      |                                   |                  |                         |
| ≥ 300                                      | 0                                | -                                 | -                | -                       | 0                                                    | -                                 | -                | -                       |
| 200-299                                    | 0                                | -                                 | -                | -                       | 0                                                    | -                                 | -                | -                       |
| 100-199                                    | 5                                | 39-46                             | 41               | 22-60                   | 1                                                    | -                                 | 46               | 36-56                   |
| 25-99                                      | 8                                | 23-41                             | 37               | 16-57                   | 5                                                    | 32-33                             | 35               | 12-58                   |
| 0-24                                       | 5                                | 21-29                             | 22               | 12-33                   | 1                                                    | -                                 | 29               | 22-38                   |

| Study description                          | Prevalence of LTBI - all studies |                                   |                  |                         | Prevalence of LTBI - high and medium quality studies |                                   |                  |                         |
|--------------------------------------------|----------------------------------|-----------------------------------|------------------|-------------------------|------------------------------------------------------|-----------------------------------|------------------|-------------------------|
|                                            | Study data                       |                                   | Pooled estimates |                         | Study data                                           |                                   | Pooled estimates |                         |
|                                            | Number of studies                | IQ range for prevalence estimates | Prevalence (%)   | 95% confidence interval | Number of studies                                    | IQ range for prevalence estimates | Prevalence (%)   | 95% confidence interval |
| <b>Prevalence of LTBI measured by IGRA</b> |                                  |                                   |                  |                         |                                                      |                                   |                  |                         |
| Allied health professionals                |                                  |                                   |                  |                         |                                                      |                                   |                  |                         |
| ≥ 300                                      | 1                                | -                                 | 67               | 48-81                   | 0                                                    | -                                 | -                | -                       |
| 200-299                                    | 1                                | -                                 | 62               | 36-82                   | 0                                                    | -                                 | -                | -                       |
| 100-199                                    | 5                                | 23-38                             | 33               | 15-52                   | 1                                                    | -                                 | 58               | 49-68                   |
| 25-99                                      | 9                                | 25-35                             | 32               | 17-47                   | 6                                                    | 12-55                             | 34               | 11-56                   |
| 0-24                                       | 5                                | 15-19                             | 16               | 12-21                   | 2                                                    | 20-23                             | 19               | 14-25                   |
| General services                           |                                  |                                   |                  |                         |                                                      |                                   |                  |                         |
| ≥ 300                                      | 0                                | -                                 | -                | -                       | 0                                                    | -                                 | -                | -                       |
| 200-299                                    | 0                                | -                                 | -                | -                       | 0                                                    | -                                 | -                | -                       |
| 100-199                                    | 0                                | -                                 | -                | -                       | 0                                                    | -                                 | -                | -                       |
| 25-99                                      | 1                                | -                                 | 74               | 66-80                   | 1                                                    | -                                 | 74               | 66-80                   |
| 0-24                                       | 1                                | -                                 | 14               | 6-31                    | 0                                                    | -                                 | -                | -                       |
| Health care students                       |                                  |                                   |                  |                         |                                                      |                                   |                  |                         |
| ≥ 300                                      | 1                                | -                                 | 15               | 9-25                    | 0                                                    | -                                 | -                | -                       |
| 200-299                                    | 2                                | 32-40                             | 33               | 28-38                   | 0                                                    | -                                 | -                | -                       |
| 100-199                                    | 0                                | -                                 | -                | -                       | 0                                                    | -                                 | -                | -                       |
| 25-99                                      | 1                                | -                                 | 10               | 7-15                    | 1                                                    | -                                 | 10               | 7-15                    |
| 0-24                                       | 0                                | -                                 | -                | -                       | 0                                                    | -                                 | -                | -                       |

**Table S4d. Results of meta-regression for the prevalence of LTBI in HCWs included all variables (n=5) in the analysis**

| Covariates                                                  | Odds Ratio | 95% CI |     | P-value        |
|-------------------------------------------------------------|------------|--------|-----|----------------|
| Type of test (ref IGRA)                                     | 1          |        |     |                |
| TST                                                         | 1.2        | 0.8    | 2.0 | 0.368          |
| TB incidence (ref 0-24/100,000 population)                  | 1          |        |     |                |
| 25-99                                                       | 1.9        | 0.8    | 4.3 | 0.137          |
| 100-199                                                     | 0.9        | 0.4    | 2.3 | 0.910          |
| 200-299                                                     | 8.4        | 3.3    | 2.2 | <b>0.00001</b> |
| ≥ 300                                                       | 2.9        | 1.1    | 8.2 | <b>0.0399</b>  |
| Type of participants (ref Allied health professionals)      | 1          |        |     |                |
| Physicians                                                  | 0.9        | 0.5    | 1.7 | 0.809          |
| Nurses                                                      | 1.2        | 0.8    | 1.8 | 0.399          |
| General services                                            | 1.2        | 0.7    | 2.1 | 0.407          |
| Health care students                                        | 0.3        | 0.1    | 0.6 | <b>0.003</b>   |
| Others (combination)                                        | 1.5        | 0.9    | 2.6 | 0.145          |
| Type of settings (ref tertiary/university/general hospital) | 1          |        |     |                |
| Clinics/health centers                                      | 1.2        | 0.4    | 3.1 | 0.730          |
| TB/Chest disease hospital                                   | 0.9        | 0.4    | 1.9 | 0.836          |
| Specialized hospital                                        | 1.0        | 0.4    | 2.5 | 0.980          |
| Others (combination)                                        | 1.2        | 0.5    | 2.8 | 0.616          |
| Study quality (ref low)                                     | 1          |        |     |                |
| High and medium                                             | 1.0        | 0.7    | 1.5 | 0.944          |

**Table S5. Risk factors associated with prevalence of LTBI measured by TST and IGRA**

| Study                         | Type of participants | Number of participants | Occupational                                                                                                                                            |                                                                                                                   | Non Occupational                                                                                                                                   |                                                                         |
|-------------------------------|----------------------|------------------------|---------------------------------------------------------------------------------------------------------------------------------------------------------|-------------------------------------------------------------------------------------------------------------------|----------------------------------------------------------------------------------------------------------------------------------------------------|-------------------------------------------------------------------------|
|                               |                      |                        | Risk factors assessed                                                                                                                                   | Significant risk factors in multivariate analysis; Adjusted OR (95% CI)                                           | Risk factors assessed                                                                                                                              | Significant risk factors in multivariate analysis; Adjusted OR (95% CI) |
| Risk Factors for Positive TST |                      |                        |                                                                                                                                                         |                                                                                                                   |                                                                                                                                                    |                                                                         |
| Agaya, 2015                   | All types of HCWs    | 898                    | Active TB contact, Facility type, Duration worked in health care, Job type, Job location                                                                | Active TB contact (ref no): yes; 1.8 (1.3-2.4)<br>Duration worked in health care (ref <2 y): >10 y; 2.3 (1.3-4.0) | Sex, HIV status, Number of persons per room in household                                                                                           | Male sex; 1.8 (1.3-2.4)                                                 |
| Belo, 2017                    | All types of HCWs    | 209                    | Administrative control measures, Contact with TB patients at workplace, Working time, Employment setting, Occupational category, Co-workers TB positive | Not significant                                                                                                   | Age, Sex, Perceived health status, Immunosuppression, People living at same house (> 6), Contact with TB at home, BCG vaccination, Current smoking | Immunosuppression: yes; 5.82 (1.84-18.39)                               |
| Borroto                       | All types of HCWs    | 350                    | Occupation at risk, Contact with TB patient                                                                                                             | Contact with TB patient; Prevalence risk ratio 1.72 (1.1-2.8) <sup>a</sup>                                        | Sex, BCG scar                                                                                                                                      | Not clear                                                               |



| Study               | Type of participants           | Number of participants | Occupational                                                                                                                                                                                                                                                                                                                                     |                                                                         | Non Occupational                                                                                                                                                                                                                |                                                                                               |
|---------------------|--------------------------------|------------------------|--------------------------------------------------------------------------------------------------------------------------------------------------------------------------------------------------------------------------------------------------------------------------------------------------------------------------------------------------|-------------------------------------------------------------------------|---------------------------------------------------------------------------------------------------------------------------------------------------------------------------------------------------------------------------------|-----------------------------------------------------------------------------------------------|
|                     |                                |                        | Risk factors assessed                                                                                                                                                                                                                                                                                                                            | Significant risk factors in multivariate analysis; Adjusted OR (95% CI) | Risk factors assessed                                                                                                                                                                                                           | Significant risk factors in multivariate analysis; Adjusted OR (95% CI)                       |
| Christopher, 2010   | Nursing students               | 436                    | Worked in health care prior to current training program, time (years) spent in health care work after entry, Worked together with a TB patients (previously or during current training, Conversational distance contact with a pulmonary TB patient, Number of days spent working in medium or high risk ward, Patient-days caring for active TB | Time (years) spent in health care work after entry; 1.19 (1.10-1.28)    | Age (years), Age at entry (years) (Age-years in health care), Sex, Body mass index, Highest education achieved, Current nursing course, Average household monthly income, BCG scar, Past history of TST, Previous TB assessment | Not significant                                                                               |
| Chung-Delgado, 2012 | Medical students               | 547                    | Not determined                                                                                                                                                                                                                                                                                                                                   | Not determined                                                          | Sex, Age, Year of university entry, Previous TB, Smoking, Alcohol consumption, BMI                                                                                                                                              | Year of university entry: 2009-2010; 0.47 (0.29-0.77)<br>Previous TB: yes; 12.47 (2.02-77.03) |
| Dagnew, 2012        | Medical, Paramedical students, | 107                    | Department, Year of study                                                                                                                                                                                                                                                                                                                        | Not significant                                                         | Age, Place of birth, Religion, Khat consumption, BCG scar, BMI                                                                                                                                                                  | Age; 1.6 (1.11-2.20)<br>Khat consumption: yes; 9.2 (1.41-59.69)                               |
| de Oliveira, 2007   | All types of HCWs              | 194                    | Not determined                                                                                                                                                                                                                                                                                                                                   | Not determined                                                          | Gender, Age, Drinker, Smoker                                                                                                                                                                                                    | Smoker: Yes; RR 1.72 (1.20-2.45) <sup>a</sup>                                                 |

| Study          | Type of participants | Number of participants | Occupational                                                                                                                                                      |                                                                                                                                                                                                                                                                                           | Non Occupational                                                                                                          |                                                                                                                                       |
|----------------|----------------------|------------------------|-------------------------------------------------------------------------------------------------------------------------------------------------------------------|-------------------------------------------------------------------------------------------------------------------------------------------------------------------------------------------------------------------------------------------------------------------------------------------|---------------------------------------------------------------------------------------------------------------------------|---------------------------------------------------------------------------------------------------------------------------------------|
|                |                      |                        | Risk factors assessed                                                                                                                                             | Significant risk factors in multivariate analysis; Adjusted OR (95% CI)                                                                                                                                                                                                                   | Risk factors assessed                                                                                                     | Significant risk factors in multivariate analysis; Adjusted OR (95% CI)                                                               |
| de Souza, 2014 | All types of HCWs,   | 632                    | Professional category, Work only at primary health care, Years served in health care profession at primary health care                                            | Years served in health care profession at primary health care (ref < 5): $\geq 5$ ; 1.66 (1.12-2.47)                                                                                                                                                                                      | Gender, Age, Presence of BCG scar, Contact with a household member with TB, Alcohol abuse, Prior TST, Smoker, Comorbidity | Age group (ref 19-30 y): 36-40 y; 41-45 y; 2.11 (1.13-3.93), 46-64 y; 2.02 (1.14-3.58)<br>Presence of BCG scar: yes; 1.78 (1.09-2.90) |
| He, 2010       | All types of HCWs    | 2153                   | Position, Job location, Duration of employment (years), Inpatient ward, Size of clinic (no. of staff), Level                                                      | Job location (ref administrative/logistic): TB outpatient clinic; 1.9 (1.4-2.6), Supervision and monitoring; 1.6 (1.2-2.3), X-ray department; 1.8 (1.1-2.9)<br>Duration of employment (ref < 1 y): 5-9 y; 2.3 (1.6-3.1), $\geq 10$ y; 3.0 (2.2-4.1)<br>Inpatient ward: yes; 2.3 (1.9-2.9) | Gender and smoking, Age group, BCG scar, Income, Education,                                                               | Age (ref 18-29 y): 30-39 y; 1.6 (1.2-2.1), 40-49 y; 1.8 (1.3-2.5), $\geq 50$ y; 2.6 (1.7-4.0)<br>BCG scar: yes; 1.4 (1.1-1.7)         |
| He, 2012       | All types of HCWs    | 924                    | Hospital, Job category, Years in health care, Cared for TB patient in last year, Average daily time in patient last year, Ever had co-worker with TB, Aware of TB | Years in health care (ref < 1): $> 15$ ; 3.43 (2.08-5.66)<br>Cared for TB patient in last year: yes; 1.72 (1.06-2.78)                                                                                                                                                                     | Age, Sex, Education, Self-report having BCG, Household contact with TB, Smoking status, Density of household              | Male sex; 1.84 (1.25-2.70)<br>Household contact with TB: yes; 1.92 (1.01-3.65)                                                        |

| Study                 | Type of participants                                              | Number of participants | Occupational                                                                                                                                                                 |                                                                         | Non Occupational                                                                              |                                                                                                                    |
|-----------------------|-------------------------------------------------------------------|------------------------|------------------------------------------------------------------------------------------------------------------------------------------------------------------------------|-------------------------------------------------------------------------|-----------------------------------------------------------------------------------------------|--------------------------------------------------------------------------------------------------------------------|
|                       |                                                                   |                        | Risk factors assessed                                                                                                                                                        | Significant risk factors in multivariate analysis; Adjusted OR (95% CI) | Risk factors assessed                                                                         | Significant risk factors in multivariate analysis; Adjusted OR (95% CI)                                            |
|                       |                                                                   |                        | infection control guidelines, Had infection control training ever                                                                                                            |                                                                         |                                                                                               |                                                                                                                    |
| He, 2015              | Village doctor                                                    | 875                    | Working duration, Minutes spend on diagnosing one patient, Whether referred suspected TB patient in recent three years, Density of clinical areas (m <sup>2</sup> per staff) | Not significant                                                         | Gender, Age, Education, BCG scar, Smoking status, Average yearly income, Density of household | Male gender: NS<br>BCG scar: yes; 1.45 (1.03-2.04)<br>Smoking status: yes; 1.67 (1.17-2.44)                        |
| Kargi, 2017           | All types of HCWs                                                 | 100                    | Occupation, Duration of work                                                                                                                                                 | Not determined                                                          | Age, gender, BCG positivity                                                                   | Not significant <sup>a</sup>                                                                                       |
| Khawcharoenporn, 2009 | Medical students                                                  | 166                    | History of TB exposure                                                                                                                                                       | Not significant                                                         | BCG scar, Age, Sex                                                                            | BCG scar: yes; associated with an initial TST 1.97 (1.05-3.66), associated with a booster effect 3.97 (1.25-12.46) |
| Kiertiburanakul, 2012 | Nurses, Nursing assistants, Nursing students and medical students | 1438                   | Type of Health care personnel                                                                                                                                                | Not significant                                                         | Age, Gender, Positive BCG scar, Year of TST                                                   | Age; NS<br>Male gender; 1.82 (1.33-2.49)<br>Positive BCG scar; 1.46 (1.12-1.91)<br>Year of TST; 0.76 (0.69-0.84)   |

| Study             | Type of participants | Number of participants | Occupational                                                                                           |                                                                                                                                                                               | Non Occupational                                                                                                                                        |                                                                                                                                 |
|-------------------|----------------------|------------------------|--------------------------------------------------------------------------------------------------------|-------------------------------------------------------------------------------------------------------------------------------------------------------------------------------|---------------------------------------------------------------------------------------------------------------------------------------------------------|---------------------------------------------------------------------------------------------------------------------------------|
|                   |                      |                        | Risk factors assessed                                                                                  | Significant risk factors in multivariate analysis; Adjusted OR (95% CI)                                                                                                       | Risk factors assessed                                                                                                                                   | Significant risk factors in multivariate analysis; Adjusted OR (95% CI)                                                         |
| Li-fan, 2013      | All types of HCWs    | 96                     | Job category, Years served in the health care profession, Exposure to sputum smear positive TB patient | Not significant                                                                                                                                                               | Age, gender, BCG vaccine scar                                                                                                                           | Not significant                                                                                                                 |
| Lopes, 2008       | Nurses               | 128                    | Length of professional activity, Last professional contact with pulmonary TB patients                  | Length of professional activity (ref $\leq 5$ y): $> 5$ y; 6.3 (1.5-26.3)<br>Last professional contact with pulmonary TB patients (ref $< 2$ y): $\geq 2$ y; 11.3 (1.2-106.3) | Not determined                                                                                                                                          | Not determined                                                                                                                  |
| Lou, 2015         | All types of HCSs    | 288                    | Contact with a case of TB                                                                              | Contact with a case of TB: yes; 1.86 (p-value 0.022)                                                                                                                          | Age, Sex, Course, Student categorization, History of smoking, History of alcohol intake, HIV status, BCG vaccination scar, Knowledge of TB transmission | Male sex; 2.23 (p-value 0.004)<br>Course (ref bachelor's degrees in Medicine and Surgery): Dental Surgery; 3.17 (p-value 0.014) |
| Mirtskulava, 2008 | All types of HCWs    | 265                    | Occupation, Length of employment as a HCW, Has routine direct contact with TB patients                 | Length of employment as a HCW (ref $\leq 5$ y): $> 5$ y; 5.09 (2.77-9.33)                                                                                                     | Age, Gender, Education level, Positive history of BCG                                                                                                   | Not significant                                                                                                                 |
| Mostafavi, 2016   | Lab personnel        | 177                    | Job group, History of work (year), Contact with TB patients                                            | Not significant                                                                                                                                                               | Sex, Age, Education level, BCG vaccination                                                                                                              | Not significant                                                                                                                 |

| Study          | Type of participants            | Number of participants | Occupational                                                                                               |                                                                                                                                                                                                                                                                                                                                                                                                                                                | Non Occupational                                                                                                                             |                                                                                                                                             |
|----------------|---------------------------------|------------------------|------------------------------------------------------------------------------------------------------------|------------------------------------------------------------------------------------------------------------------------------------------------------------------------------------------------------------------------------------------------------------------------------------------------------------------------------------------------------------------------------------------------------------------------------------------------|----------------------------------------------------------------------------------------------------------------------------------------------|---------------------------------------------------------------------------------------------------------------------------------------------|
|                |                                 |                        | Risk factors assessed                                                                                      | Significant risk factors in multivariate analysis; Adjusted OR (95% CI)                                                                                                                                                                                                                                                                                                                                                                        | Risk factors assessed                                                                                                                        | Significant risk factors in multivariate analysis; Adjusted OR (95% CI)                                                                     |
| Munisamy, 2017 | All types of HCWs               | 399                    | Occupation category, Time worked in current position, Total time working in health care, Current workplace | Occupation category (ref management): health professional; 2.07 (1.34-3.55), allied health staff; 2.03 (1.02-2.78), support staff; 2.21 (1.19-3.89)<br>Time worked in current position (ref < 5 y): 5-9 y; 1.77 (1.04-4.67), > 10 y: 1.59 (1.12-3.93)<br>Current workplace (ref non-clinical areas): outpatient areas; 1.51 (1.07-4.46), inpatient wards 1.67 (1.10-4.32), intensive care unit/operation theater 1.36 (1.09-3.94) <sup>a</sup> | Age, Ethnicity, Gender, Marital status, Chronic disease, Diabetes mellitus, Hypertension, Ischemic heart disease, Dyslipidemia, Lung disease | Chronic disease: any (one or more); 1.19 (1.03-2.14)<br>Diabetes mellitus: yes; 1.38 (1.11-2.85) <sup>a</sup>                               |
| Nasehi, 2017   | Lab personnel and low risk HCWs | 1006                   | Group, Length of employment, Contact with TB patients                                                      | Group (ref low risk HCWs): TB lab staff; 2.06 (1.35-3.17)                                                                                                                                                                                                                                                                                                                                                                                      | Sex, Age, Education level, History of smoking, Chronic disease                                                                               | Education level (ref elementary): associate's degree; 0.50 (0.28-0.80), license; 0.40 (0.23-0.69)<br>Chronic disease: yes; 1.82 (1.13-2.95) |
| Powell, 2011   | All types of HCWs               | 956                    | Department assignment, Work setting, Job assignment                                                        | Not significant                                                                                                                                                                                                                                                                                                                                                                                                                                | Age, Sex                                                                                                                                     | Age (ref 20-28 y): 29-40 y; 1.9 (1.3-2.9), 41-45 y; 2.2 (1.5-3.3), ≥ 45 y; 2.1 (1.3-3.1)                                                    |

| Study         | Type of participants     | Number of participants | Occupational                                                                                                                                                                                                                                                                                                                                                   |                                                                                              | Non Occupational                                                                                                                                                                               |                                                                                                            |
|---------------|--------------------------|------------------------|----------------------------------------------------------------------------------------------------------------------------------------------------------------------------------------------------------------------------------------------------------------------------------------------------------------------------------------------------------------|----------------------------------------------------------------------------------------------|------------------------------------------------------------------------------------------------------------------------------------------------------------------------------------------------|------------------------------------------------------------------------------------------------------------|
|               |                          |                        | Risk factors assessed                                                                                                                                                                                                                                                                                                                                          | Significant risk factors in multivariate analysis; Adjusted OR (95% CI)                      | Risk factors assessed                                                                                                                                                                          | Significant risk factors in multivariate analysis; Adjusted OR (95% CI)                                    |
|               |                          |                        |                                                                                                                                                                                                                                                                                                                                                                |                                                                                              |                                                                                                                                                                                                | Male sex; 1.5 (1.1-2.1)                                                                                    |
| Rogério, 2015 | Community health workers | 307                    | Working in a primary care unit that had implemented a TB control program, Media duration of employment, Working in facility with high risk of TB, Frequency of using personal protective equipment, Easy access to personal protective equipment, Received any training on TB, How good training for the clinical practice, Frequency on get information on TB | Working in a primary care unit that had implemented a TB control program: yes; 1.9 (1.1-3.4) | Sex, Age, Education level, District classification (high or medium prevalence), Taking immunosuppressant treatment, BCG vaccination, History of household contact with TB, Previous TST result | History of household contact with TB: yes; 1.7 (1.1-3.0)<br>Level of education: University; 3.6 (1.1-11.9) |
| Rutanga, 2015 | All types of HCWs        | 1023                   | Facility type, Years worked in health care, Department assignment, Work setting, Job assignment                                                                                                                                                                                                                                                                | Years worked in health care: each additional year; 1.01 (1.01-1.06)                          | Age, Gender, HIV status                                                                                                                                                                        | Not significant                                                                                            |

| Study                            | Type of participants                   | Number of participants | Occupational                                                                                                                                                                                                                                                            |                                                                                                                                                                                                                                                                  | Non Occupational                                                                                                                                                                                                                                             |                                                                         |
|----------------------------------|----------------------------------------|------------------------|-------------------------------------------------------------------------------------------------------------------------------------------------------------------------------------------------------------------------------------------------------------------------|------------------------------------------------------------------------------------------------------------------------------------------------------------------------------------------------------------------------------------------------------------------|--------------------------------------------------------------------------------------------------------------------------------------------------------------------------------------------------------------------------------------------------------------|-------------------------------------------------------------------------|
|                                  |                                        |                        | Risk factors assessed                                                                                                                                                                                                                                                   | Significant risk factors in multivariate analysis; Adjusted OR (95% CI)                                                                                                                                                                                          | Risk factors assessed                                                                                                                                                                                                                                        | Significant risk factors in multivariate analysis; Adjusted OR (95% CI) |
| Severo, 2011                     | Nurses                                 | 55                     | Occupation, Duration of employment, Workplace                                                                                                                                                                                                                           | Not significant                                                                                                                                                                                                                                                  | Gender, Skin color, Age, BCG scar, Smoker,                                                                                                                                                                                                                   | Not significant                                                         |
| van Rie, 2013 (Medical Students) | Medical students                       | 79                     | Not determined                                                                                                                                                                                                                                                          | Not determined                                                                                                                                                                                                                                                   | Age, Gender, Non-occupational TB contact, TB knowledge score                                                                                                                                                                                                 | TB knowledge score (ref > 8): $\leq 8$ ; 0.29 (0.09-0.98)               |
| van Rie, 2013 (HCWs)             | HCWs                                   | 120                    | Job category                                                                                                                                                                                                                                                            | Not significant                                                                                                                                                                                                                                                  | Age, Gender, HIV status, Non-occupational TB contact, TB knowledge score                                                                                                                                                                                     | Not significant                                                         |
| Whitaker, 2013                   | All types of HCWs and medical students | 308                    | Contact with TB patients, Years in healthcare, Occupation                                                                                                                                                                                                               | Occupation (ref admin): Nurse; 2.77 (1.01-7.55)                                                                                                                                                                                                                  | Gender, Age, BCG vaccine history                                                                                                                                                                                                                             | Age in years; 1.05 (1.01-1.10)                                          |
| Zhou, 2014                       | All types of HCWs                      | 529                    | Duration of healthcare profession, Type of hospital, Department of hospital work, Had ever worked in TB clinic or ward, Had ever worked in HIV clinic or ward, Contact with blood or other body fluid in work, Work hours everyday, Consistent mask use in professional | Duration of healthcare profession (ref $\leq 5$ y): 6-10 y; 1.89 (1.10-3.25), > 10 y; 1.80 (1.20-2.68)<br>Type of hospital (ref general hospital): infectious disease hospital; 2.40 (1.59-3.62)<br>Had ever worked in HIV clinic or ward: yes; 1.87 (1.08-3.26) | Sex, Age, Han Ethnic, Education status, Profession qualification, Monthly income, Residential area, Live status, Average per-capita living space, Smoking, Drinking, Calcium/vitamin supplement, Physical exercise (times per week), Self-reported using BCG | Not significant                                                         |

| Study                                 | Type of participants             | Number of participants | Occupational                                                                                                                                                                                                                                             |                                                                                                                                                           | Non Occupational                                               |                                                                         |
|---------------------------------------|----------------------------------|------------------------|----------------------------------------------------------------------------------------------------------------------------------------------------------------------------------------------------------------------------------------------------------|-----------------------------------------------------------------------------------------------------------------------------------------------------------|----------------------------------------------------------------|-------------------------------------------------------------------------|
|                                       |                                  |                        | Risk factors assessed                                                                                                                                                                                                                                    | Significant risk factors in multivariate analysis; Adjusted OR (95% CI)                                                                                   | Risk factors assessed                                          | Significant risk factors in multivariate analysis; Adjusted OR (95% CI) |
|                                       |                                  |                        | work, Kind of mask used in medical work, Wash hands, Attending regular physical examination every time, Attending infection control training, Intimate contact with TB patients, Knowledge of TB prevention and control, Policy of TB treatment and care |                                                                                                                                                           |                                                                |                                                                         |
| <b>Risk Factors for Positive IGRA</b> |                                  |                        |                                                                                                                                                                                                                                                          |                                                                                                                                                           |                                                                |                                                                         |
| Babayigit, 2014                       | All types of HCWs                | 96                     | Health care facility, Working duration                                                                                                                                                                                                                   | Health care facility (ref university hospital): TB control dispensary; 22.05 (1.35-358.85)<br>Working duration (months); 1.017 (1.002-1.033) <sup>a</sup> | Age                                                            | Not determined                                                          |
| Dagnew, 2012                          | Medical and paramedical students | 107                    | Department, Year of study                                                                                                                                                                                                                                | Not significant                                                                                                                                           | Age, Place of birth, Religion, Khat consumption, BCG scar, BMI | Age; 1.7 (1.17-2.35)<br>Khat consumption: yes; 9.6 (1.36-68.13)         |



| Study             | Type of participants      | Number of participants | Occupational                                                                                                                                                                                                                        |                                                                                                                                                                                                  | Non Occupational                                                                                                          |                                                                                                                                         |
|-------------------|---------------------------|------------------------|-------------------------------------------------------------------------------------------------------------------------------------------------------------------------------------------------------------------------------------|--------------------------------------------------------------------------------------------------------------------------------------------------------------------------------------------------|---------------------------------------------------------------------------------------------------------------------------|-----------------------------------------------------------------------------------------------------------------------------------------|
|                   |                           |                        | Risk factors assessed                                                                                                                                                                                                               | Significant risk factors in multivariate analysis; Adjusted OR (95% CI)                                                                                                                          | Risk factors assessed                                                                                                     | Significant risk factors in multivariate analysis; Adjusted OR (95% CI)                                                                 |
| de Souza, 2014    | All types of HCWs         | 632                    | Professional category, Work only at primary health care, Years served in health care profession at primary health care                                                                                                              | Years served in health care profession at primary health care (ref < 5): $\geq 5$ ; 1.70 (1.07-2.71)                                                                                             | Gender, Age, Presence of NCG scar, Contact with a household member with TB, Alcohol abuse, Prior TST, Smoker, Comorbidity | Female gender; 0.47 (0.26-0.85)<br>Presence of BCG scar: yes; 0.54 (0.32-0.90)                                                          |
| Drobniewski, 2007 | Medical students          | 238                    | Not stated clearly                                                                                                                                                                                                                  | Not significant                                                                                                                                                                                  | Not stated clearly                                                                                                        | Not significant                                                                                                                         |
| Drobniewski, 2007 | All type of HCWs          | 262                    | Work in a TB clinic, More than 5 years in medical practice                                                                                                                                                                          | Work in a TB clinic; 1.9 (1.1-3.5)                                                                                                                                                               | Age, TB in the past, Gender                                                                                               | Not significant                                                                                                                         |
| El-Sokkary, 2015  | Nurses and Lab personnel, | 132                    | Profession, Duration of work                                                                                                                                                                                                        | Profession (p= 0.01)<br>Duration of work (p=0.032)                                                                                                                                               | Age, Sex, BCG vaccination, HCV, Smoking, Family history of TB, Diabetes mellitus                                          | Family history of TB (p=0.042), Diabetes mellitus (p=0.024)                                                                             |
| He, 2012          | All types of HCWs         | 999                    | Hospital, Job category, Years in health care, Cared for TB patient in last year, Average daily time in patient last year, Ever had co-worker with TB, Aware of TB infection control guidelines, Had infection control training ever | Years in health care (ref < 1): $> 15$ ; 1.94 (1.13-3.32)<br>Average daily time in patient last year (ref 0): $> 4$ hours; 1.87 (1.21-2.89)<br>Ever had co-worker with TB: yes; 1.86 (1.01-3.42) | Age, Sex, Education, Self-report having BCG, Household contact with TB, Smoking status, Density of household              | Age (ref 18-29): 30-39 y; NS, 40-49 y; 1.93 (1.15-3.24), $\geq 50$ y; 3.21 (1.77-5.82)<br>Self-report having BCG: yes; 0.61 (0.42-0.88) |

| Study             | Type of participants | Number of participants | Occupational                                                                                                                                                                 |                                                                         | Non Occupational                                                                              |                                                                                                                                                                          |
|-------------------|----------------------|------------------------|------------------------------------------------------------------------------------------------------------------------------------------------------------------------------|-------------------------------------------------------------------------|-----------------------------------------------------------------------------------------------|--------------------------------------------------------------------------------------------------------------------------------------------------------------------------|
|                   |                      |                        | Risk factors assessed                                                                                                                                                        | Significant risk factors in multivariate analysis; Adjusted OR (95% CI) | Risk factors assessed                                                                         | Significant risk factors in multivariate analysis; Adjusted OR (95% CI)                                                                                                  |
| He, 2015          | Village doctor       | 866                    | Working duration, Minutes spend on diagnosing one patient, Whether referred suspected TB patient in recent three years, Density of clinical areas (m <sup>2</sup> per staff) | Working duration (ref < 15 y): >25 y; 1.64 (1.12-2.39)                  | Gender, Age, Education, BCG scar, Smoking status, Average yearly income, Density of household | Male gender; 2.69 (2.02-3.58)<br>Education (ref college or above): below college; 1.42 (1.01-1.97)                                                                       |
| Kargi, 2017       | All types of HCWs    | 100                    | Occupation, Duration of work                                                                                                                                                 | Not significant                                                         | Age, gender, BCG positivity                                                                   | Not determined                                                                                                                                                           |
| Li-fan, 2013      | All types of HCWs    | 101                    | Job category, Years served in the health care profession, Exposure to sputum smear positive TB patient                                                                       | Exposure to sputum smear positive TB patients: yes; 5.76 (1.38-24.00)   | Age, gender, BCG vaccine scar                                                                 | Not significant                                                                                                                                                          |
| Lien, 2009        | All types of HCWs    | 300                    | Hospital, Job, Working years, Mask use                                                                                                                                       | Hospital: TB; 1.94 (1.04-3.64)                                          | Age, Sex, BMI, Education                                                                      | BMI (ref 18.5-25.0): $\geq 25$ ; 4.18 (1.14-15.36)<br>Education (ref university and higher): high school and lower; 4.28 (1.28-14.27), Pre-university; 3.54 (1.18-10.59) |
| Mirtskulava, 2008 | All types of HCWs    | 265                    | Occupation, Length of employment as a HCW, Has routine direct contact with                                                                                                   | Length of employment as a HCW (ref $\leq 5$ y): > 5 y; 2.26 (1.27-4.01) | Age, Gender, Education level, Positive history of BCG                                         | Age (ref $\leq 30$ y): > 30 y; 2.91 (1.32-6.43)                                                                                                                          |

| Study                | Type of participants | Number of participants | Occupational                                                                                                                                                                              |                                                                                                                                                                                                                 | Non Occupational                                                                                                                                                        |                                                                                                                                                                             |
|----------------------|----------------------|------------------------|-------------------------------------------------------------------------------------------------------------------------------------------------------------------------------------------|-----------------------------------------------------------------------------------------------------------------------------------------------------------------------------------------------------------------|-------------------------------------------------------------------------------------------------------------------------------------------------------------------------|-----------------------------------------------------------------------------------------------------------------------------------------------------------------------------|
|                      |                      |                        | Risk factors assessed                                                                                                                                                                     | Significant risk factors in multivariate analysis; Adjusted OR (95% CI)                                                                                                                                         | Risk factors assessed                                                                                                                                                   | Significant risk factors in multivariate analysis; Adjusted OR (95% CI)                                                                                                     |
|                      |                      |                        | TB patients                                                                                                                                                                               |                                                                                                                                                                                                                 |                                                                                                                                                                         |                                                                                                                                                                             |
| Mostafavi, 2016      | Lab personnel        | 177                    | Job group, History of work (year), Contact with TB patients                                                                                                                               | Not significant                                                                                                                                                                                                 | Sex, Age, Education level, BCG vaccination                                                                                                                              | Not significant                                                                                                                                                             |
| Nonghanphithak, 2016 | All types of HCWs    | 112                    | Occupation, Work location, Employment length in years, Hours worked per day, Known TB exposure in the hospital, Type of exposure, Frequency of handling TB specimens or patients per week | Occupation (ref housekeepers/general duties): Nurse; 2.78 (1.19-6.49)<br>Employment length in years (ref < 10 y): $\geq 10$ y: 8.78 (1.26-62.29)<br>Known TB exposure in the hospital: yes; 13.32 (1.61-110.04) | Gender, Age, BMI, BCG vaccination, Education                                                                                                                            | Age (ref < 30 y): $\geq 30$ y; 18.880 (1.52-234.36)                                                                                                                         |
| Ozdemir, 2007        | All types of HCWs    | 76                     | Working duration                                                                                                                                                                          | Not significant                                                                                                                                                                                                 | Gender, Age, BCG status, TB history                                                                                                                                     | Not significant                                                                                                                                                             |
| Rafiza, 2011         | All types of HCWs    | 953                    | Duration of employment, Risk group, Job category, Workplace, Clinical base                                                                                                                | Job category (ref others): Nurse; 4.65 (1.10-19.65)                                                                                                                                                             | Age, Sex, Marital status, Race, Level of education, Income group, Body mass index, Lived in same house with friend/family with active TB, Co-morbid condition, Previous | Age group (ref $\leq 24$ y): $\geq 35$ y; 9.49 (2.22-40.50)<br>Male sex; 3.70 (1.36-10.02)<br>Lived in same house with friend/family with active TB: yes; 8.69 (3.00-25.18) |

| Study                            | Type of participants                   | Number of participants | Occupational                                              |                                                                         | Non Occupational                                                         |                                                                                                    |
|----------------------------------|----------------------------------------|------------------------|-----------------------------------------------------------|-------------------------------------------------------------------------|--------------------------------------------------------------------------|----------------------------------------------------------------------------------------------------|
|                                  |                                        |                        | Risk factors assessed                                     | Significant risk factors in multivariate analysis; Adjusted OR (95% CI) | Risk factors assessed                                                    | Significant risk factors in multivariate analysis; Adjusted OR (95% CI)                            |
|                                  |                                        |                        |                                                           |                                                                         | active TB, Had received TB treatment, Substance abuse                    |                                                                                                    |
| Thuong, 2016                     | All types of HCWs                      | 109                    | Job, Working place                                        | Not significant                                                         | Age, Sex, BMI, Granulysin concentration (by ng/ml)                       | BMI (ref 18.5-24.9): $\geq 25.0$ ; 8.43 (1.37-51.75)<br>Granulysin concentration; 0.55 (0.31-0.98) |
| van Rie, 2013 (Medical students) | All types of HCWs                      | 79                     | Not determined                                            | Not determined                                                          | Age, Gender, Non-occupational TB contact, TB knowledge score             | Not significant                                                                                    |
| van Rie, 2013 (HCWs)             | Medical students                       | 120                    | Job category                                              | Not significant                                                         | Age, Gender, HIV status, Non-occupational TB contact, TB knowledge score | Not significant                                                                                    |
| Wei, 2013                        | All types of HCWs                      | 210                    | Nurse, Length of work                                     | Nurse: yes; 2.43 (1.08-5.44)                                            | Age, BCG vaccination                                                     | Age (ref < 30 y): $\geq 30$ y; 6.15 (1.88-20.15)                                                   |
| Whitaker, 2013                   | All types of HCWs and medical students | 319                    | Contact with TB patients, Years in healthcare, Occupation | Contact with TB patients (ref rare): frequent; 3.04 (1.79-5.14)         | Gender, Age, BCG vaccine history                                         | Age in years; 1.05 (1.01-1.09)                                                                     |

| Study          | Type of participants         | Number of participants | Occupational                                    |                                                                                                                                                                                      | Non Occupational                                            |                                                                         |
|----------------|------------------------------|------------------------|-------------------------------------------------|--------------------------------------------------------------------------------------------------------------------------------------------------------------------------------------|-------------------------------------------------------------|-------------------------------------------------------------------------|
|                |                              |                        | Risk factors assessed                           | Significant risk factors in multivariate analysis; Adjusted OR (95% CI)                                                                                                              | Risk factors assessed                                       | Significant risk factors in multivariate analysis; Adjusted OR (95% CI) |
| Zhang, 2013    | All types of HCWs            | 755                    | Working years, Job, Workplace, Laboratory staff | Working years (ref $\leq 2$ y): 11-20 y; 3.57 (1.46-8.71), > 20 y; 3.41 (1.28-9.11)<br>Job (ref admin staff): technician staff; 2.02 (1.12-3.64), laboratory staff; 2.76 (1.36-5.60) | Age, Gender, Education, The history of household TB contact | The history of household TB contact: yes; 2.47 (1.15-5.33)              |
| Zwerling, 2013 | Nursing and medical students | 226                    | Number days spent working on medical wards      | Not significant                                                                                                                                                                      | Not determined                                              | Not determined                                                          |

<sup>a</sup>Significant risk factors in univariate analysis for all studies where multivariate analysis was not done or reported

HCWs, health care workers

HCSs, health care students

**Table S6a. Incidence of LTBI in HCWs as measured by TST conversion**

| Study (Author, Year, Country) | Type of participants | Period of follow up | TST conversion definition <sup>a</sup> | Number of total initially tested | Number of negative at initial | Number of retested | Number of conversions | TST conversion rate |           | Annual incidence rate (%; 95% CI) <sup>b</sup> |
|-------------------------------|----------------------|---------------------|----------------------------------------|----------------------------------|-------------------------------|--------------------|-----------------------|---------------------|-----------|------------------------------------------------|
|                               |                      |                     |                                        |                                  |                               |                    |                       | %                   | 95% CI    |                                                |
| Adams, 2015, South Africa     | All types of HCWs    | One year            | B                                      | 147                              | 34                            | 34                 | 13                    | 38.2                | 22-56     | 38.2 (22-56)                                   |
| Borrito, 2011, Cuba           | All types of HCWs    | One year            | A                                      | 350                              | 296                           | 220                | 3                     | 1.4                 | 0.3-3.9   | 1.4 (0.3-3.9)                                  |
| Calixto-Aguilar, 2016, Cuba   | Medical students     | Maximum two years   | A                                      | 548                              | 511                           | 548                | 61                    | 11.1                | 8.6-14.1  | 5.6 (4.3-7.1)                                  |
| Christopher, 2011, India      | Nursing students     | One year            | B                                      | 436                              | 217                           | 179                | 14                    | 7.8                 | 4.3-12.8  | 7.8 (4.3-12.8)                                 |
| Chung-Delgado, 2012, Peru     | Medical students     | One year            | B                                      | 547                              | 468                           | 505                | 24                    | 4.7                 | 3.1-6.9   | 4.7 (3.1-6.9)                                  |
| Corbett, 2007, Zimbabwe       | Nursing students     | 6-12-18 months      | B                                      | 351                              | 159                           | 148                | 30                    | 20.3                | 14.1-27.7 | -                                              |

| Study (Author, Year, Country)   | Type of participants                                     | Period of follow up   | TST conversion definition <sup>a</sup> | Number of total initially tested | Number of negative at initial | Number of retested | Number of conversions | TST conversion rate |           | Annual incidence rate (%; 95% CI) <sup>b</sup> |
|---------------------------------|----------------------------------------------------------|-----------------------|----------------------------------------|----------------------------------|-------------------------------|--------------------|-----------------------|---------------------|-----------|------------------------------------------------|
|                                 |                                                          |                       |                                        |                                  |                               |                    |                       | %                   | 95% CI    |                                                |
| de Miranda, 2012, Brazil        | All types of HCWs                                        | One year              | B                                      | 251                              | 122                           | 39                 | 2                     | 5.1                 | 0.6-17.3  | 5.1 (0.6-17.3)                                 |
| Emadi-Koochak, 2009, Brazil     | Medical students and pharmacy students                   | Three years           | B                                      | 256                              | 239                           | 212                | 24                    | 11.3                | 7.4-16.4  | 3.8 (2.4-5.6)                                  |
| Gonzalez, 2011, Argentina       | All types of HCWs and medical students                   | Within two years      | A                                      | 1549                             | 544                           | 275                | 23                    | 8.3                 | 5.4-12.3  | 4.2 (2.7-6.2)                                  |
| He, 2015, China                 | Village doctor                                           | One year              | A                                      | 618                              | 465                           | 465                | 53                    | 11.4                | 8.6-14.6  | 11.4 (8.6-14.6)                                |
|                                 |                                                          |                       | C                                      | 618                              | 465                           | 465                | 45                    | 9.7                 | 7.1-12.7  | 9.7 (7.1-12.7)                                 |
|                                 |                                                          |                       | B                                      | 618                              | 465                           | 465                | 37                    | 7.9                 | 5.7-10.8  | 7.9 (5.7-10.8)                                 |
| Kiertiburanakul, 2012, Thailand | Nurses, nursing assistance, nursing and medical students | One year              | C                                      | 1438                             | 485                           | 369                | 42                    | 11.4                | 8.3-15.1  | 11.4 (8.3-15.1)                                |
| Lopes, 2008, Brazil             | Nurses, Nursing aids                                     | One year              | A                                      | 128                              | 49                            | 32                 | 7                     | 21.9                | 9.3-39.9  | 21.9 (9.3-39.9)                                |
| McCarthy, 2015, South Africa    | All types of HCWs and medical students                   | 6 months and one year | A                                      | 196                              | 107                           | 93                 | 25                    | 26.7                | 18.2-37.1 | -                                              |
| Moreira, 2010, Brazil           | Community Health Agents                                  | One year              | B                                      | 72                               | 61                            | 61                 | 15                    | 24.5                | 14.5-37.3 | 24.5 (14.5-37.3)                               |
| Pai, 2006, India                | Nursing and medical students                             | 1,5 year              | B                                      | 353                              | 168                           | 147                | 6                     | 4.1                 | 1.5-8.7   | 2.7 (1.0-5.8)                                  |
|                                 |                                                          |                       | C                                      | 353                              | 168                           | 147                | 14                    | 9.5                 | 5.3-15.5  | 6.3 (3.5-10.4)                                 |
| Perez-Lu, 2013, Peru            | All types of HCSs                                        | One year              | A                                      | 4842                             | Not clear                     | Not clear          | Not clear             |                     |           | -                                              |
| Rabahi, 2007, Brazil            | All types of HCWs                                        | One year              | B                                      | 437                              | 257                           | 131                | 28                    | 21.3                | 14.7-29.4 | 21.3 (14.7-29.4)                               |

| Study (Author, Year, Country) | Type of participants                   | Period of follow up | TST conversion definition <sup>a</sup> | Number of total initially tested | Number of negative at initial | Number of retested | Number of conversions | TST conversion rate |           | Annual incidence rate (%; 95% CI) <sup>b</sup> |
|-------------------------------|----------------------------------------|---------------------|----------------------------------------|----------------------------------|-------------------------------|--------------------|-----------------------|---------------------|-----------|------------------------------------------------|
|                               |                                        |                     |                                        |                                  |                               |                    |                       | %                   | 95% CI    |                                                |
|                               |                                        | Two years           | B                                      | -                                | 103                           | 90                 | 12                    | 13.3                | 7.1-22.1  | -                                              |
|                               |                                        | Three years         | B                                      | -                                | 78                            | 40                 | 3                     | 7.5                 | 1.5-20.4  | -                                              |
| Sawanyawisuth, 2012, Thailand | All types of HCWs                      | One year            | B                                      | Not clear                        | Not clear                     | 1025               | 203                   | 19.8                | 17.4-22.4 | 19.8 (17.4-22.4)                               |
| Whitaker, 2013, Georgia       | All types of HCWs and medical students | 6-26 months         | B                                      | 308                              | 135                           | 48                 | 11                    | 22.9                | 12.0-37.3 | -                                              |

<sup>a</sup>TST conversion definition:

A: A newly positive TST (induration >10 mm) after a documented negative-baseline TST (induration of <10 mm) at any time after a negative two-step baseline, or more than 1 year after a negative single TST

B: Baseline TST <10 mm and a follow up TST >10 mm and a 10 mm increase over the baseline

C: Baseline TST <10 mm and a follow up TST >10 mm and a 6 mm increase over the baseline

<sup>b</sup>All incidence were converted to an annual incidence or equivalent to an annual incidence

**Table S6b. Incidence of LTBI in HCWs as measured by IGRA conversion**

| Study (Author, Year, Country) | Type of participants | IGRA used | Period of follow up | IGRA conversion definition <sup>a</sup> | Number of total initially tested | Number of negative at initial | Number of retested | Number of conversions | IGRA conversion rate |           | Annual incidence rate (%; 95% CI) <sup>b</sup> |
|-------------------------------|----------------------|-----------|---------------------|-----------------------------------------|----------------------------------|-------------------------------|--------------------|-----------------------|----------------------|-----------|------------------------------------------------|
|                               |                      |           |                     |                                         |                                  |                               |                    |                       | %                    | 95% CI    |                                                |
| Adams, 2015, South Africa     | All types of HCWs    | QFT-GIT   | One year            | A                                       | 332                              | 113                           | 113                | 25                    | 22.1                 | 14.9-30.9 | 22.1 (14.9-30.9)                               |
|                               |                      |           |                     | B                                       | 332                              | 113                           | 113                | 20                    | 17.7                 | 11.2-26.0 | 17.7 (11.2-26.0)                               |
|                               |                      |           |                     | C                                       | 332                              | 113                           | 113                | 16                    | 14.2                 | 8.3-21.9  | 14.2                                           |

|                                    |                                                 |               |                                          |   |     |     |                  |    |      |           |                     |
|------------------------------------|-------------------------------------------------|---------------|------------------------------------------|---|-----|-----|------------------|----|------|-----------|---------------------|
|                                    |                                                 |               |                                          |   |     |     |                  |    |      |           | (8.3-21.9)          |
|                                    |                                                 |               |                                          | D | 332 | 113 | 113              | 15 | 13.3 | 7.6-20.9  | 13.3<br>(7.6-20.9)  |
|                                    |                                                 | T-<br>SPOT.TB | One<br>year                              | A | 292 | 115 | 115              | 25 | 21.7 | 14.6-30.4 | 21.7<br>(14.6-30.4) |
|                                    |                                                 |               |                                          | B | 292 | 115 | 115              | 23 | 20   | 13.1-28.5 | 20<br>(13.1-28.5)   |
| Escombe,<br>2010, Peru             | All types of<br>HCWs                            | QFT-GIT       | One<br>year                              | A | 70  | 39  | 27               | 8  | 30   | 13.7-50.2 | 30<br>(13.7-50.2)   |
| He, 2015,<br>China                 | Village<br>doctors                              | QFT-GIT       | One<br>year                              | A | 613 | 361 | 361              | 69 | 19.1 | 15.2-23.6 | 19.1<br>(15.2-23.6) |
|                                    |                                                 |               |                                          | B | 613 | 361 | 361              | 68 | 18.8 | 14.9-23.2 | 18.8<br>(14.9-23.2) |
|                                    |                                                 |               |                                          | C | 613 | 361 | 361              | 63 | 17.5 | 13.7-21.8 | 17.5<br>(13.7-21.8) |
|                                    |                                                 |               |                                          | D | 613 | 361 | 361              | 52 | 14.4 | 10.9-18.5 | 14.4<br>(10.9-18.5) |
| McCarthy,<br>2015, South<br>Africa | All types of<br>HCWs and<br>Medical<br>students | QFT-GIT       | 6<br>months<br>& one<br>year             | A | 196 | 97  | 97               | 25 | 25.8 | 17.4-35.7 | -                   |
| Pai, 2006,<br>India                | Nursing and<br>medical<br>students              | QFT-GIT       | 1,5<br>year                              | A | 353 | 208 | 147              | 17 | 11.6 | 6.9-17.9  | 7.7<br>(4.5-12.0)   |
|                                    |                                                 |               |                                          | D | 353 | 208 | 147              | 11 | 7.5  | 3.8-13.0  | 4.9 (2.5-8.7)       |
| Rafiza, 2012,<br>Malaysia          | All types of<br>HCWs                            | QFT-GIT       | One<br>year                              | A | 954 | 704 | 704              | 69 | 9.8  | 7.7-12.2  | 9.8<br>(7.7-12.2)   |
| Whitaker,<br>2013,<br>Georgia      | All types of<br>HCWs and<br>Medical<br>students | QFT-GIT       | 6-26<br>months                           | A | 319 | 173 | 77               | 23 | 29.9 | 19.9-41.4 | -                   |
| Zwerling,<br>2013, India           | Nursing and<br>medical<br>students              | QFT-GIT       | Every<br>6<br>months<br>for 18<br>months | A | 270 | 162 | 441 <sup>c</sup> | 63 | 14.3 | 11.1-17.9 | -                   |

<sup>a</sup>QFT-GIT conversion definition:

A: baseline TB antigen-Nil <0.35 IU/ml and follow up TB antigen-Nil ≥0.35 IU/ml



B: baseline TB antigen-Nil <0.35IU/ml and follow up TB antigen-Nil ≥0.35IU/ml, plus a 30% increase over the baseline  
C: baseline TB antigen-Nil <0.35IU/ml and follow up TB antigen-Nil ≥0.35IU/ml, plus an absolute increase of 0.35IU/ml over the baseline  
D: baseline TB antigen-Nil<0.35IU/ml and follow up TB antigen-Nil ≥0.70IU/ml  
T-SPOT.TB conversion definition:  
A: baseline TSPOT.TB negative and follow-up positive using the ≥6 spot increment  
B: baseline T-SPOT.TB negative and follow-up positive using the ≥8 spot increment  
<sup>b</sup>All incidence were converted to an annual incidence or equivalent to an annual incidence  
<sup>c</sup>Treating each period as an independent observation

**Table S6c. IGRA reversion rates (annual)**

| Study (Author, Year, Country) | Type of participants | IGRA used | Period of follow up | Number of positive at initial and retested | Number of reversions | IGRA reversion rate |           |
|-------------------------------|----------------------|-----------|---------------------|--------------------------------------------|----------------------|---------------------|-----------|
|                               |                      |           |                     |                                            |                      | %                   | 95% CI    |
| Adams, 2015, South Africa     | All types of HCWs    | QFT-GIT   | One year            | 219                                        | 15                   | 6.8                 | 3.9-11.0  |
| Escombe, 2010, Peru           | All types of HCWs    | QFT-GIT   | One year            | 20                                         | 1                    | 5                   | 1.3-24.9  |
| He, 2015, China               | Village doctors      | QFT-GIT   | One year            | 252                                        | 53                   | 21.0                | 16.2-26.6 |

|                        |                              |         |          |    |    |      |           |
|------------------------|------------------------------|---------|----------|----|----|------|-----------|
| Pai, 2006, India       | Nursing and medical students | QFT-GIT | 1,5 year | 38 | 9  | 23.7 | 11.4-40.2 |
| Rafiza, 2012, Malaysia | All types of HCWs            | QFT-GIT | One year | 64 | 19 | 29.7 | 18.9-42.4 |

**Table S7. Risk factors associated with LTBI incidence measured TST and IGRA conversion**

| Study                           | Type of participants | Number of participants | Occupational                                                                                                                                                                                                                                                                    |                                                                                                                                  | Non Occupational                                                                                                                                                                          |                                                                         |
|---------------------------------|----------------------|------------------------|---------------------------------------------------------------------------------------------------------------------------------------------------------------------------------------------------------------------------------------------------------------------------------|----------------------------------------------------------------------------------------------------------------------------------|-------------------------------------------------------------------------------------------------------------------------------------------------------------------------------------------|-------------------------------------------------------------------------|
|                                 |                      |                        | Risk factors assessed                                                                                                                                                                                                                                                           | Significant risk factors in multivariate analysis; Adjusted OR (95% CI)                                                          | Risk factors assessed                                                                                                                                                                     | Significant risk factors in multivariate analysis; Adjusted OR (95% CI) |
| Risk Factors for TST Conversion |                      |                        |                                                                                                                                                                                                                                                                                 |                                                                                                                                  |                                                                                                                                                                                           |                                                                         |
| Adams, 2015                     | All types of HCWs    | 34                     | Employment sector, Formal health qualification, Occupational tasks, Facility factors, Employment in health care                                                                                                                                                                 | Engaged in counseling TB patients; 0.12 (0.15–0.92)                                                                              | Diabetes, Current alcohol consumption, Smoking history, BCG vaccination, HIV positive status, TB symptom screen positive, Interval Referral for TB/HIV, History of TB Treatment (ever TB) | Not significant                                                         |
| Chung-Delgado, 2012             | Medical students     | 505                    | Not determined                                                                                                                                                                                                                                                                  | Not determined                                                                                                                   | Sex, Age, Year of university entry, Previous TB, Smoking, Alcohol consumption, BMI                                                                                                        | Year of university entry: 2009-2010; 2.53 (1.11-5.76)                   |
| Christopher, 2011               | Nursing students     | 179                    | Nursing course currently enrolled, Total time spent in health care, Direct contact with sputum positive TB patients, Days spent caring for pulmonary TB patients, Ever performed or assisted in sputum collection, Days spent working on isolation wards, Days spent working on | Days spent caring for pulmonary TB patients; 1.12 (1.04-1.20) Ever performed or assisted in sputum collection; 4.57 (1.11-18.86) | Age, BCG vaccination, BMI, Highest level of education completed, Average household monthly income, QFT positive, Continuous IGRA result                                                   | QFT positive; 5.89 (1.72-20.23)                                         |

| Study          | Type of participants | Number of participants | Occupational                                                                                                                                                                 |                                                                         | Non Occupational                                                                                                                                                                                        |                                                                         |
|----------------|----------------------|------------------------|------------------------------------------------------------------------------------------------------------------------------------------------------------------------------|-------------------------------------------------------------------------|---------------------------------------------------------------------------------------------------------------------------------------------------------------------------------------------------------|-------------------------------------------------------------------------|
|                |                      |                        | Risk factors assessed                                                                                                                                                        | Significant risk factors in multivariate analysis; Adjusted OR (95% CI) | Risk factors assessed                                                                                                                                                                                   | Significant risk factors in multivariate analysis; Adjusted OR (95% CI) |
|                |                      |                        | pulmonary medicine wards                                                                                                                                                     |                                                                         |                                                                                                                                                                                                         |                                                                         |
| Corbett, 2007  | Nursing students     | 148                    | Not determined                                                                                                                                                               | Not determined                                                          | Age, Sex, Crowding in the family home, type of student accommodation, Community contact with TB patient during study, Having parents who were HCWs, HIV infection status, BCG vaccination, Previous TST | Not significant                                                         |
| da Costa, 2009 | All types of HCWs    | Not clear              | Occupation, Work location, Ward with respiratory isolation room, Exposure to pulmonary TB case in hospital                                                                   | Exposure to pulmonary TB case in hospital: yes; 0.31 (0.13-0.73)        | Sex, BCG scar                                                                                                                                                                                           | Not significant                                                         |
| He, 2015       | Village doctor       | 465                    | Working duration, Minutes spend on diagnosing one patient, Whether referred suspected TB patient in recent three years, Density of clinical areas (m <sup>2</sup> per staff) | Working duration (ref < 15 y): 15-25 y; 0.46 (0.22-0.96)                | Gender, Age, Education, BCG scar, Smoking status, Average yearly income, Density of household                                                                                                           | Not significant                                                         |

| Study                                                                | Type of participants                   | Number of participants | Occupational                                                                                                                                             |                                                                                                                                                                            | Non Occupational      |                                                                                                                 |
|----------------------------------------------------------------------|----------------------------------------|------------------------|----------------------------------------------------------------------------------------------------------------------------------------------------------|----------------------------------------------------------------------------------------------------------------------------------------------------------------------------|-----------------------|-----------------------------------------------------------------------------------------------------------------|
|                                                                      |                                        |                        | Risk factors assessed                                                                                                                                    | Significant risk factors in multivariate analysis; Adjusted OR (95% CI)                                                                                                    | Risk factors assessed | Significant risk factors in multivariate analysis; Adjusted OR (95% CI)                                         |
| McCarthy, 2015                                                       | All types of HCWs and medical students | 93                     | Occupation, TB exposure, TB knowledge score, TB infection control training, TB infection control practiced by participant, TB infection control practice | Not significant                                                                                                                                                            | Sex, HIV status, Age  | Not significant                                                                                                 |
| Perez-Lu, 2013                                                       | All types of HCSs                      | Not clear              | TB contact history, Careers, Internship year                                                                                                             | Careers (ref admin, science, and education): dentistry: 1.28 (1.05-1.54), nursing; 1.61(1.35-1.92), medical technology; 1.51 (1.27-1.78) Internship year; 1.94 (1.64-2.30) | Age, Sex, BMI,        | Age (ref under 18 y): 18 y: 2.97 (2.29-3.84), between 18-21 y; 3.92 (3.09-4.96), 21 y or more; 4.00 (3.16-5.06) |
| Sawanyawisuth, 2012                                                  | All types of HCWs                      | 1025                   | Job                                                                                                                                                      | Job (ref office staff): nurses; 2.3 (1.3-4.1), nurse assistants; 2.3 (1.3-4.7), ward workers; 3.0 (1.8-5.0), technicians; 1.2 (0.5-2.6)                                    | Gender, BCG scar      | Male gender; 3.0 (1.9-4.6) BCG scar; 1,5 (1.0-2.3)                                                              |
| Risk factors associated with LTBI incidence measured IGRA conversion |                                        |                        |                                                                                                                                                          |                                                                                                                                                                            |                       |                                                                                                                 |

| Study          | Type of participants                   | Number of participants | Occupational                                                                                                                                                                 |                                                                                                                                                                                                                                                                                                      | Non Occupational                                                                                                                                                                          |                                                                         |
|----------------|----------------------------------------|------------------------|------------------------------------------------------------------------------------------------------------------------------------------------------------------------------|------------------------------------------------------------------------------------------------------------------------------------------------------------------------------------------------------------------------------------------------------------------------------------------------------|-------------------------------------------------------------------------------------------------------------------------------------------------------------------------------------------|-------------------------------------------------------------------------|
|                |                                        |                        | Risk factors assessed                                                                                                                                                        | Significant risk factors in multivariate analysis; Adjusted OR (95% CI)                                                                                                                                                                                                                              | Risk factors assessed                                                                                                                                                                     | Significant risk factors in multivariate analysis; Adjusted OR (95% CI) |
| Adams, 2015    | All types of HCWs                      | 113                    | Employment sector, Formal health qualification, Occupational tasks, Facility factors, Employment in health care                                                              | Using QFT-GIT: Engaged in counseling TB patients; 3.04 (1.01–9.15)<br>Using T-SPOT.TB: Employment sector, individuals in local authority employment working for the provincial health department (OR 14.19, 95% CI 1.28–157.75), and having a positive TST at baseline (OR 3.40, 95% CI 1.02–11.34). | Diabetes, Current alcohol consumption, Smoking history, BCG vaccination, HIV positive status, TB symptom screen positive, Interval Referral for TB/HIV, History of TB Treatment (ever TB) | Not significant                                                         |
| He, 2015       | Village doctors                        | 361                    | Working duration, Minutes spend on diagnosing one patient, Whether referred suspected TB patient in recent three years, Density of clinical areas (m <sup>2</sup> per staff) | Minutes spend on diagnosing one patient (ref < 15 minutes): ≥ 15 minutes; 2.62 (1.39–4.97)                                                                                                                                                                                                           | Gender, Age, Education, BCG scar, Smoking status, Average yearly income, Density of household                                                                                             | Not significant                                                         |
| McCarthy, 2015 | All types of HCWs and Medical students | 97                     | Occupation, TB exposure, TB knowledge score, TB infection control training, TB infection control practiced by participant, TB                                                | Occupation (ref medical student): HCW; 7.7 (1.6–36.9)                                                                                                                                                                                                                                                | Sex, HIV status, Age                                                                                                                                                                      | Not significant                                                         |

| Study          | Type of participants                   | Number of participants | Occupational                                              |                                                                         | Non Occupational                 |                                                                         |
|----------------|----------------------------------------|------------------------|-----------------------------------------------------------|-------------------------------------------------------------------------|----------------------------------|-------------------------------------------------------------------------|
|                |                                        |                        | Risk factors assessed                                     | Significant risk factors in multivariate analysis; Adjusted OR (95% CI) | Risk factors assessed            | Significant risk factors in multivariate analysis; Adjusted OR (95% CI) |
|                |                                        |                        | infection control practice                                |                                                                         |                                  |                                                                         |
| Rafiza, 2012   | All types of HCWs                      | 704                    | Duration of employment, Job category, Workplace           | Workplace (ref other): emergency department; RR 2.18 (1.07-4.43)        | Sex, Age                         | Not significant                                                         |
| Whitaker, 2013 | All types of HCWs and Medical students | 77                     | Contact with TB patients, Years in healthcare, Occupation | Not significant                                                         | Gender, Age, BCG vaccine history | Increasing age per year; 1.07 (1.01-1.13)                               |
| Zwerling, 2013 | Nursing and medical students           | 270                    | Occupational exposure                                     | Not significant                                                         | Not determined                   | Not determined                                                          |

**Table S8. TB infection control (IC) measures in health care facilities**

| <b>Author, Year, Reference</b> | <b>Any TB IC measures at health care setting</b> | <b>TB IC policy, plan, assessment, and TB surveillance</b> | <b>Staff capacity building</b> | <b>Patient triage and management</b> | <b>Sputum management</b> | <b>Staff protection (personal respiratory protection)</b> | <b>Environmental controls</b> | <b>TB IC practices adequate</b> | <b>How they measured TB IC practice in their health facility</b> |
|--------------------------------|--------------------------------------------------|------------------------------------------------------------|--------------------------------|--------------------------------------|--------------------------|-----------------------------------------------------------|-------------------------------|---------------------------------|------------------------------------------------------------------|
| Christopher, 2010              | Yes                                              | Yes                                                        | Not stated                     | Yes                                  | Not stated               | Yes                                                       | Not stated                    | No                              | Not stated                                                       |
| Christopher, 2011              | Yes                                              | Yes                                                        | Not stated                     | No                                   | Not stated               | Not stated                                                | No                            | No                              | Not stated                                                       |
| da Costa, 2009                 | Yes                                              | Yes                                                        | Yes                            | Yes                                  | Not stated               | Yes                                                       | Yes                           | Not clear                       | Not stated                                                       |
| de Miranda, 2012               | Yes                                              | Not stated                                                 | Not stated                     | No                                   | Not stated               | Yes                                                       | Not stated                    | Not clear                       | Not stated                                                       |
| Escombe, 2010                  | Yes                                              | Not stated                                                 | Not stated                     | No                                   | Not stated               | No                                                        | No                            | No                              | Not stated                                                       |
| Franco, 2006                   | Yes                                              | Not stated                                                 | Not stated                     | Not stated                           | Not stated               | Yes                                                       | Yes                           | No                              | Not stated                                                       |
| He, 2010                       | Yes                                              | Yes                                                        | Not stated                     | Yes                                  | Not stated               | No                                                        | Yes                           | No                              | Not stated                                                       |
| Hohmuth, 2006                  | Yes                                              | Not stated                                                 | Not stated                     | No                                   | Not stated               | No                                                        | Not stated                    | Not clear                       | Not stated                                                       |
| Kiertiburanakul, 2012          | Yes                                              | Not stated                                                 | Not stated                     | Not stated                           | Not stated               | Not stated                                                | Yes                           | Not clear                       | Not stated                                                       |
| Lopes, 2008                    | Yes                                              | Not stated                                                 | Not stated                     | Not stated                           | Not stated               | Not stated                                                | Not stated                    | No                              | CDC guidelines                                                   |
| McCarthy, 2015                 | Yes                                              | No                                                         | Not stated                     | Not stated                           | Not stated               | Not stated                                                | Not stated                    | Not clear                       | Not stated                                                       |
| Powell, 2011                   | Yes                                              | No                                                         | Not stated                     | Yes                                  | Yes                      | No                                                        | Yes                           | No                              | WHO guidelines                                                   |
| Rutanga, 2015                  | Yes                                              | Yes                                                        | No                             | Yes                                  | Not stated               | Not stated                                                | Yes                           | Not clear                       | Not stated                                                       |
| Ratnatunga, 2015               | Yes                                              | No                                                         | Not stated                     | Yes                                  | Not stated               | Not stated                                                | No                            | No                              | Not stated                                                       |
| Zwerling, 2013                 | Yes                                              | Not stated                                                 | Not stated                     | Not stated                           | Not stated               | No                                                        | Not stated                    | No                              | Not stated                                                       |



**Table S9. Summary of non-English studies where an English abstract was available**

| <b>First Author</b> | <b>Year</b> | <b>Journal</b>                              | <b>Language (Country)</b> | <b>Study type</b>               | <b>Type of participants</b> | <b>No of participants</b> | <b>Principle findings</b>                                                                   |
|---------------------|-------------|---------------------------------------------|---------------------------|---------------------------------|-----------------------------|---------------------------|---------------------------------------------------------------------------------------------|
| Cesur               | 2010        | Mikrobiyoloji Bulteni                       | Turkish (Turkey)          | Cross-sectional TST and QFT-GIT | HCWs                        | 19                        | TST positivity rate 36.8%<br>QFT-GIT positivity rate 47.4%                                  |
| Demir               | 2014        | Anatolian Journal of Clinical Investigation | Turkish (Turkey)          | Cohort TST                      | HCWs                        | 201                       | Prevalence of LTBI 31.8% (64/201)                                                           |
| Karaman             | 2011        | Duzce Medical Journal                       | Turkish (Turkey)          | Cross-sectional TST             | Hospital cleaning staff     | 106                       | The prevalence of LTBI 74.5%                                                                |
| Ozturk              | 2007        | Mikrobiyoloji Bulteni                       | Turkish (Turkey)          | Cross-sectional TST and QFT-GIT | HCWs                        | 74                        | No data                                                                                     |
| Yilmaz              | 2013        | Asim, Allerji, Immunoloji                   | Turkish (Turkey)          | Cross-sectional TST             | HCWs                        | 60                        | TST was found over 10 mm in all subjects<br>TST was found over 15 mm in 65% of the subjects |
